# Supplementary material for: Mitochondrial Complex I Disruption Causes Broad Reorchestration of Plant Lipidome Including Chloroplast Lipids
Source: MDPI journal article supplement (doi:10.3390/ijms24010453), 2022-12-27
Supplement: s1 [file s1]

## Supplementary material

**Figure S1.** Summary of lipid metabolism.

**List S1.** Main abbreviations used for lipid species.

**Table S1.** List of detected lipids in leaves of both *ndufs4* and Col0 (Arabidopsis) with loadings of multivariate statistics ( $p_{\text{corr}}$ ) and *P*-value from univariate statistics.

**Table S2.** List of detected lipids in leaves of both *ndufs8* and Col0 (Arabidopsis) with loadings of multivariate statistics ( $p_{\text{corr}}$ ) and *P*-value from univariate statistics.

**Table S3.** List of detected lipids in leaves of both *CMSII* and WT (tobacco) with loadings of multivariate statistics ( $p_{\text{corr}}$ ) and *P*-value from univariate statistics.

**Table S4.** List of detected lipids in seeds of both *ndufs4* and Col0 (Arabidopsis) with loadings of multivariate statistics ( $p_{\text{corr}}$ ) and *P*-value from univariate statistics.

**Table S5.** List of detected lipids in seeds of both *ndufs8* and Col0 (Arabidopsis) with loadings of multivariate statistics ( $p_{\text{corr}}$ ) and *P*-value from univariate statistics.

**Table S6.** List of detected lipids in seeds of both *CMSII* and WT (tobacco) with loadings of multivariate statistics ( $p_{\text{corr}}$ ) and *P*-value from univariate statistics.

**Table S7.** List of detected lipids in pollen of both *CMSII* and WT (tobacco) with loadings of multivariate statistics ( $p_{\text{corr}}$ ) and *P*-value from univariate statistics.

- CLS – cardiolipin synthase
- PGS – phosphatidylglycerol synthase
- PLD – phospholipase D
- PSS – phosphatidylserine synthase
- SPT – serine palmitoyl-transferase

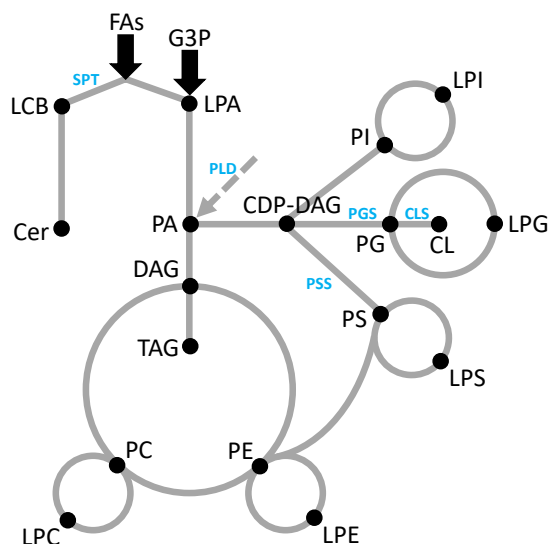

**In leaves**  
 ● Increase  
 ● Decrease

**In seeds**  
 ● Increase  
 ● Decrease

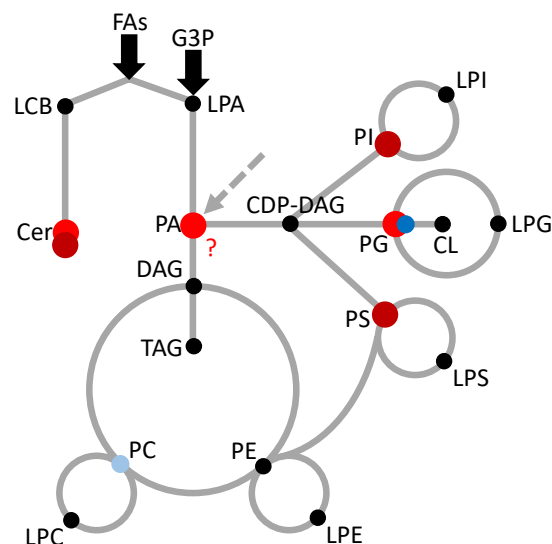

**Figure S1. Summary of lipid biosynthetic pathways and observed changes in complex I mutants.** (a) pathways with enzymes mentioned in text (in blue). (b) overview of changes observed in mutants with increases (red) and decreases (blue). For simplicity, the biosynthesis of galactolipids (chloroplast) is not shown here. Cer, ceramides; CL, cardiolipins; DAG, diacylglycerol; FAs, fatty acids; G3P, glycerol 3-phosphate; LCB, long chain base; PA, phosphatidic acid; PC, phosphatidyl choline; PE, phosphatidyl ethanolamine; PG, phosphatidyl glycerol; PI, phosphatidyl inositol; PS, phosphatidyl serine; TAG, triglycerides (triacylglycerol). Upper case ‘L’ stands for “lyso”. Grey circles indicate the possibility of cycling between species shown. Phospholipid cleavage and recycling can generate PA, and it is shown with a dashed grey arrow. The link between PE and PS represents the interconversion between PE and PS. In (b), the question mark symbolises uncertainty about the increase in PA (see main text). Changes in pollen (which are limited to data collected in tobacco) are not shown here.

**List S1.** Main abbreviations used for lipid species in the paper.

| Abbreviation | Meaning                                                                                                                                                                                                                                                                      |
|--------------|------------------------------------------------------------------------------------------------------------------------------------------------------------------------------------------------------------------------------------------------------------------------------|
| LPC          | Lyso phosphatidyl-choline                                                                                                                                                                                                                                                    |
| PC           | Phosphatidyl-choline                                                                                                                                                                                                                                                         |
| LPG          | Lyso phosphatidyl-glycerol                                                                                                                                                                                                                                                   |
| PG           | Phosphatidyl-glycerol                                                                                                                                                                                                                                                        |
| LPE          | Lyso phosphatidyl-ethanolamine                                                                                                                                                                                                                                               |
| PE           | Phosphatidyl-ethanolamine                                                                                                                                                                                                                                                    |
| dMePE        | Dimethyl phosphatidyl-ethanolamine                                                                                                                                                                                                                                           |
| LPI          | Lyso phosphatidyl-inositol                                                                                                                                                                                                                                                   |
| PI           | Phosphatidyl-inositol                                                                                                                                                                                                                                                        |
| PL           | Phospholipids                                                                                                                                                                                                                                                                |
| PS           | Phosphatidyl-serine                                                                                                                                                                                                                                                          |
| DG           | Diacylglycerol (diglycerides)                                                                                                                                                                                                                                                |
| TG           | Triacylglycerol (triglycerides)                                                                                                                                                                                                                                              |
| PA           | Phosphatidic acid                                                                                                                                                                                                                                                            |
| PMe          | Phosphatidyl-methanol                                                                                                                                                                                                                                                        |
| PEt          | Phosphatidyl-ethanol                                                                                                                                                                                                                                                         |
| CL           | Cardiolipin                                                                                                                                                                                                                                                                  |
| Cer          | Ceramide                                                                                                                                                                                                                                                                     |
| MGDG         | Monogalactosyl-diacylglycerol                                                                                                                                                                                                                                                |
| DGDG         | Digalactosyl-diacylglycerol                                                                                                                                                                                                                                                  |
| StE          | Stigmasterol ester                                                                                                                                                                                                                                                           |
| PX(n:i, m:j) | Phosphatidyl-X esterified with C <sub>n</sub> and C <sub>m</sub> fatty acid chains, with i and j unsaturations, respectively. Example, PC(18:3, 18:3): phosphatidyl-choline esterified with two C <sub>18</sub> chains carrying 3 unsaturations (linolenic type fatty acid). |

**Table S1** : List of  $p_{\text{corr}}$  from OPLS-DA and  $P$ -value from Welsch T-test of *Arabidopsis thaliana* leaf samples *ndufs4* vs *col0*

| ID                      | cat     | family | pcorr     | pvalue   | PE(16:0_18:3)           | PL      | PE      | -1.87E-01 | 6.51E-01 |
|-------------------------|---------|--------|-----------|----------|-------------------------|---------|---------|-----------|----------|
| StE(32:3)               | Sterols | StE    | -9.99E-01 | 1.32E-10 | Cer(d18:1+hO_26:0)      | Cer     | Cer     | -1.77E-01 | 6.25E-01 |
| SQDG(16:0_18:2)         | GL      | SQDG   | -9.72E-01 | 4.85E-06 | DGDG(18:3_20:0)         | GL      | DGDG    | -1.63E-01 | 6.36E-01 |
| MGDG(36:7)              | GL      | MGDG   | -9.71E-01 | 5.30E-06 | DGDG(16:2_18:3)         | GL      | DGDG    | -1.48E-01 | 6.97E-01 |
| PG(16:0_16:1)           | PL      | PG     | -9.61E-01 | 1.16E-05 | PC(16:0_18:3)           | PL      | PC      | -9.84E-02 | 8.01E-01 |
| PG(32:3)                | PL      | PG     | -9.57E-01 | 2.21E-05 | PC(33:1)                | PL      | PC      | -7.67E-02 | 8.93E-01 |
| SQDG(34:5)              | GL      | SQDG   | -9.50E-01 | 3.05E-05 | MGDG(18:2_18:3)         | GL      | MGDG    | -6.80E-02 | 8.99E-01 |
| PC(16:0_22:5)           | PL      | PC     | -9.33E-01 | 8.96E-05 | TG(18:0_16:0_18:1)      | TG      | TG      | -3.23E-02 | 9.30E-01 |
| DGDG(16:0_18:2)         | GL      | DGDG   | -9.17E-01 | 1.76E-04 | MGDG(18:1_18:3)         | GL      | MGDG    | -1.93E-02 | 9.93E-01 |
| MGDG(16:3_18:1)         | GL      | MGDG   | -9.08E-01 | 3.84E-04 | DG(24:0_18:2)           | DG      | DG      | 6.07E-03  | 9.58E-01 |
| DG(18:3_20:2)           | DG      | DG     | -8.97E-01 | 6.04E-04 | AGlcSiE(18:3)           | AGlcSiE | AGlcSiE | 2.30E-02  | 9.40E-01 |
| MGDG(16:0_16:3)         | GL      | MGDG   | -8.95E-01 | 6.35E-04 | PC(33:2)                | PL      | PC      | 8.56E-02  | 7.64E-01 |
| SiE(18:2)               | Sterols | SiE    | -8.94E-01 | 4.80E-04 | MGDG(18:3_19:2)         | GL      | MGDG    | 1.43E-01  | 6.63E-01 |
| SiE(18:3)               | Sterols | SiE    | -8.86E-01 | 7.40E-04 | PC(33:3)                | PL      | PC      | 1.52E-01  | 6.21E-01 |
| StE(18:2)               | Sterols | StE    | -8.86E-01 | 7.41E-04 | So(d22:0+pO)            | Sterols | So      | 1.63E-01  | 7.22E-01 |
| CL(72:12)               | PL      | CL     | -8.83E-01 | 1.21E-03 | DG(15:0_18:2)           | DG      | DG      | 1.78E-01  | 6.09E-01 |
| PG(16:0_18:1)           | PL      | PG     | -8.74E-01 | 1.15E-03 | PC(18:3_18:3)           | PL      | PC      | 1.86E-01  | 5.82E-01 |
| MGDG(16:0_18:3)         | GL      | MGDG   | -8.74E-01 | 1.21E-03 | PC(18:3_18:2)           | PL      | PC      | 1.86E-01  | 6.30E-01 |
| DGDG(16:3_18:3)         | GL      | DGDG   | -8.72E-01 | 8.24E-04 | PE(20:2_18:2)           | PL      | PE      | 2.36E-01  | 5.10E-01 |
| DGDG(16:0_18:1)         | GL      | DGDG   | -8.60E-01 | 1.41E-03 | CerG1(d42:2+2O)         | Cer     | CerG1   | 2.86E-01  | 3.85E-01 |
| SQDG(18:2_18:3)         | GL      | SQDG   | -8.52E-01 | 1.88E-03 | TG(16:0_16:0_18:1)      | TG      | TG      | 3.06E-01  | 3.81E-01 |
| DGDG(16:0_16:0)         | GL      | DGDG   | -8.51E-01 | 2.04E-03 | PE(18:2_18:2)           | PL      | PE      | 3.40E-01  | 3.33E-01 |
| CL(18:3_18:2_14:0_22:6) | PL      | CL     | -8.38E-01 | 3.33E-03 | PC(32:1)                | PL      | PC      | 3.54E-01  | 2.98E-01 |
| PE(24:1_18:3)           | PL      | PE     | -8.30E-01 | 3.99E-03 | DGDG(18:3_18:3)         | GL      | DGDG    | 3.54E-01  | 3.22E-01 |
| MGDG(16:1_18:1)         | GL      | MGDG   | -8.18E-01 | 4.29E-03 | Cer(d18:1+hO_25:0)      | Cer     | Cer     | 3.57E-01  | 2.99E-01 |
| MGDG(16:1_16:3)         | GL      | MGDG   | -8.18E-01 | 4.80E-03 | CerG1(d18:1+hO_24:0+O)  | Cer     | CerG1   | 3.65E-01  | 2.73E-01 |
| PI(16:1_18:3)           | PL      | PI     | -8.03E-01 | 7.35E-03 | PE(17:0_18:2)           | PL      | PE      | 3.83E-01  | 2.59E-01 |
| SQDG(16:1_18:3)         | GL      | SQDG   | -7.89E-01 | 7.30E-03 | DG(18:1_18:3)           | DG      | DG      | 3.89E-01  | 2.60E-01 |
| DGDG(18:3_20:3)         | GL      | DGDG   | -7.71E-01 | 6.68E-03 | WE(5:0_17:3)            | WE      | WE      | 3.90E-01  | 2.92E-01 |
| TG(18:0_16:0_18:3)      | TG      | TG     | -7.65E-01 | 1.39E-02 | DG(18:0_20:0)           | DG      | DG      | 4.19E-01  | 2.36E-01 |
| PG(16:1_18:3)           | PL      | PG     | -7.49E-01 | 1.01E-02 | DG(18:1_18:2)           | DG      | DG      | 4.37E-01  | 1.78E-01 |
| MGDG(16:3_18:3)         | GL      | MGDG   | -7.32E-01 | 1.40E-02 | PE(24:0_18:2)           | PL      | PE      | 4.72E-01  | 1.59E-01 |
| MGDG(16:2_18:3)         | GL      | MGDG   | -7.32E-01 | 1.89E-02 | DG(18:0_18:0)           | DG      | DG      | 4.86E-01  | 1.51E-01 |
| MGDG(16:0_18:1)         | GL      | MGDG   | -7.31E-01 | 1.69E-02 | DG(16:0_16:0)           | DG      | DG      | 4.97E-01  | 1.44E-01 |
| CerG1(d18:1+hO_25:0+O)  | Cer     | CerG1  | -7.23E-01 | 2.58E-02 | PI(18:0_18:2)           | PL      | PI      | 5.01E-01  | 1.27E-01 |
| SQDG(18:3_18:3)         | GL      | SQDG   | -7.08E-01 | 2.27E-02 | DGDG(18:1_18:3)         | GL      | DGDG    | 5.02E-01  | 1.32E-01 |
| MGDG(16:3_16:3)         | GL      | MGDG   | -6.88E-01 | 2.61E-02 | MGDG(18:0_18:2)         | GL      | MGDG    | 5.04E-01  | 1.15E-01 |
| CerG1(d18:1+hO_27:0+O)  | Cer     | CerG1  | -6.87E-01 | 3.35E-02 | CL(18:2_16:0_16:0_20:1) | PL      | CL      | 5.07E-01  | 1.37E-01 |
| CerG1(d43:2+2O)         | Cer     | CerG1  | -6.82E-01 | 3.92E-02 | Cer(d18:0+pO_26:0)      | Cer     | Cer     | 5.08E-01  | 1.36E-01 |
| DGDG(16:0_18:3)         | GL      | DGDG   | -6.71E-01 | 3.22E-02 | PE(22:0_18:2)           | PL      | PE      | 5.11E-01  | 1.25E-01 |
| Cer(d18:2_27:0+O)       | Cer     | Cer    | -6.68E-01 | 3.26E-02 | So(d20:0+pO)            | Sterols | So      | 5.46E-01  | 1.21E-01 |
| DG(18:3_18:3)           | DG      | DG     | -6.50E-01 | 5.10E-02 | PE(15:0_18:2)           | PL      | PE      | 5.50E-01  | 9.27E-02 |
| PI(15:0_18:3)           | PL      | PI     | -6.12E-01 | 7.37E-02 | PI(18:3_18:2)           | PL      | PI      | 5.53E-01  | 9.78E-02 |
| PE(18:3_18:3)           | PL      | PE     | -6.01E-01 | 7.88E-02 | PE(16:0_18:2)           | PL      | PE      | 5.78E-01  | 7.84E-02 |
| Cer(d18:2_26:0+O)       | Cer     | Cer    | -6.00E-01 | 6.94E-02 | TG(18:0_16:0_18:0)      | TG      | TG      | 5.96E-01  | 6.86E-02 |
| PC(34:6)                | PL      | PC     | -5.97E-01 | 7.70E-02 | PE(18:0_18:3)           | PL      | PE      | 6.02E-01  | 5.30E-02 |
| CL(18:3_18:2_16:1_20:4) | PL      | CL     | -5.92E-01 | 7.89E-02 | DG(16:0_18:1)           | DG      | DG      | 6.04E-01  | 6.13E-02 |
| DGDG(18:3_19:2)         | GL      | DGDG   | -5.82E-01 | 8.25E-02 | DG(16:0_18:2)           | DG      | DG      | 6.09E-01  | 6.53E-02 |
| MGDG(18:3_20:3)         | GL      | MGDG   | -5.65E-01 | 9.05E-02 | DG(18:0_16:0)           | DG      | DG      | 6.16E-01  | 5.83E-02 |
| PE(24:1_18:2)           | PL      | PE     | -5.63E-01 | 9.99E-02 | StE(30:3)               | Sterols | StE     | 6.30E-01  | 3.61E-02 |
| MGDG(17:3_18:3)         | GL      | MGDG   | -5.58E-01 | 1.05E-01 | CerG1(d18:1+hO_22:0+O)  | Cer     | CerG1   | 6.40E-01  | 4.03E-02 |
| PC(34:5)                | PL      | PC     | -5.40E-01 | 1.20E-01 | PC(16:0_18:1)           | PL      | PC      | 6.51E-01  | 4.03E-02 |
| DG(16:0_18:3)           | DG      | DG     | -5.34E-01 | 1.25E-01 | PI(16:0_18:1)           | PL      | PI      | 6.72E-01  | 2.94E-02 |
| PG(16:1_18:1)           | PL      | PG     | -5.11E-01 | 1.26E-01 | AGlcSiE(18:2)           | AGlcSiE | AGlcSiE | 6.89E-01  | 2.90E-02 |
| CerG1(d18:1+hO_23:0+O)  | Cer     | CerG1  | -5.04E-01 | 1.70E-01 | DG(18:0_18:2)           | DG      | DG      | 6.91E-01  | 2.35E-02 |
| DGDG(16:0_18:0)         | GL      | DGDG   | -4.88E-01 | 1.79E-01 | AGlcSiE(18:1)           | AGlcSiE | AGlcSiE | 6.97E-01  | 2.12E-02 |
| PC(16:1_18:3)           | PL      | PC     | -4.88E-01 | 1.78E-01 | DG(17:0_18:2)           | DG      | DG      | 6.97E-01  | 2.13E-02 |
| DG(18:3_18:2)           | DG      | DG     | -4.84E-01 | 1.72E-01 | CerG1(d18:1+hO_28:0+O)  | Cer     | CerG1   | 7.06E-01  | 2.49E-02 |
| DGDG(17:0_18:2)         | GL      | DGDG   | -4.76E-01 | 1.81E-01 | TG(18:0_18:0_18:0)      | TG      | TG      | 7.09E-01  | 2.19E-02 |
| PC(38:4)                | PL      | PC     | -4.75E-01 | 1.52E-01 | PG(18:3_18:3)           | PL      | PG      | 7.27E-01  | 1.69E-02 |
| TG(16:0_18:1_18:1)      | TG      | TG     | -4.21E-01 | 2.46E-01 | PE(18:0_18:2)           | PL      | PE      | 7.32E-01  | 1.42E-02 |
| TG(18:1_18:1_18:2)      | TG      | TG     | -3.98E-01 | 2.77E-01 | TG(18:0_16:0_16:0)      | TG      | TG      | 7.34E-01  | 1.49E-02 |
| PE(26:0_18:2)           | PL      | PE     | -3.81E-01 | 2.83E-01 | PG(16:1_18:2)           | PL      | PG      | 7.51E-01  | 1.18E-02 |
| PI(18:3_18:3)           | PL      | PI     | -3.60E-01 | 3.37E-01 | AGlcSiE(18:0)           | AGlcSiE | AGlcSiE | 7.55E-01  | 9.42E-03 |
| MGDG(18:3_20:2)         | GL      | MGDG   | -3.48E-01 | 3.40E-01 | MGDG(18:3_18:3)         | GL      | MGDG    | 7.65E-01  | 8.34E-03 |
| PG(16:0_16:0)           | PL      | PG     | -3.47E-01 | 3.39E-01 | DGDG(18:0_18:3)         | GL      | DGDG    | 7.93E-01  | 4.97E-03 |
| PE(18:3_18:2)           | PL      | PE     | -3.30E-01 | 3.70E-01 | PG(18:3_18:2)           | PL      | PG      | 8.01E-01  | 6.79E-03 |
| CL(70:5)                | PL      | CL     | -3.29E-01 | 3.90E-01 | DG(18:4_18:3)           | DG      | DG      | 8.03E-01  | 3.96E-03 |

|                    |         |         |          |          |
|--------------------|---------|---------|----------|----------|
| MGDG(18:0_18:3)    | GL      | MGDG    | 8.08E-01 | 3.37E-03 |
| Cer(d18:1+hO_24:0) | Cer     | Cer     | 8.18E-01 | 3.36E-03 |
| Cer(d18:2_24:0+O)  | Cer     | Cer     | 8.27E-01 | 2.34E-03 |
| PC(18:0_18:2)      | PL      | PC      | 8.36E-01 | 2.08E-03 |
| PS(39:1)           | PL      | PS      | 8.42E-01 | 1.82E-03 |
| TG(16:0_14:0_16:0) | TG      | TG      | 8.71E-01 | 1.11E-03 |
| AGlcSiE(16:0)      | AGlcSiE | AGlcSiE | 8.73E-01 | 7.11E-04 |
| TG(16:0_16:0_16:0) | TG      | TG      | 8.84E-01 | 6.64E-04 |
| DGDG(18:0_18:1)    | GL      | DGDG    | 9.17E-01 | 1.16E-04 |
| PC(17:1_17:1)      | PL      | PC      | 9.25E-01 | 1.65E-04 |
| MGDG(18:3_20:1)    | GL      | MGDG    | 9.26E-01 | 8.50E-05 |
| PE(16:0_18:1)      | PL      | PE      | 9.27E-01 | 9.55E-05 |
| PC(38:3)           | PL      | PC      | 9.31E-01 | 8.95E-05 |
| PC(18:1_18:3)      | PL      | PC      | 9.31E-01 | 1.31E-04 |

**Table S2** : List of  $p_{\text{corr}}$  from OPLS-DA and  $P$ -value from Welsch T-test of *Arabidopsis thaliana* leaf samples *ndufs8* vs Col0

| ID                      | cat     | family  | pcorr     | pvalue   |
|-------------------------|---------|---------|-----------|----------|
| StE(32:3)               | Sterols | StE     | -9.98E-01 | 2.50E-11 |
| SQDG(16:0_18:2)         | GL      | SQDG    | -9.13E-01 | 2.65E-04 |
| MGDG(36:7)              | GL      | MGDG    | -9.14E-01 | 2.52E-04 |
| PG(16:0_16:1)           | PL      | PG      | -8.45E-01 | 2.01E-03 |
| PG(32:3)                | PL      | PG      | 6.61E-01  | 3.38E-02 |
| SQDG(34:5)              | GL      | SQDG    | -5.71E-01 | 8.79E-02 |
| PC(16:0_22:5)           | PL      | PC      | -2.77E-01 | 4.10E-01 |
| DGDG(16:0_18:2)         | GL      | DGDG    | -9.18E-01 | 1.78E-04 |
| MGDG(16:3_18:1)         | GL      | MGDG    | -9.37E-01 | 6.14E-05 |
| DG(18:3_20:2)           | DG      | DG      | 2.24E-01  | 5.49E-01 |
| MGDG(16:0_16:3)         | GL      | MGDG    | -2.69E-01 | 4.70E-01 |
| SiE(18:2)               | Sterols | SiE     | -9.31E-01 | 7.41E-05 |
| SiE(18:3)               | Sterols | SiE     | -9.49E-01 | 2.14E-05 |
| StE(18:2)               | Sterols | StE     | -9.49E-01 | 2.13E-05 |
| CL(72:12)               | PL      | CL      | -4.98E-01 | 1.42E-01 |
| PG(16:0_18:1)           | PL      | PG      | -8.87E-01 | 6.16E-04 |
| MGDG(16:0_18:3)         | GL      | MGDG    | -9.17E-01 | 1.84E-04 |
| DGDG(16:3_18:3)         | GL      | DGDG    | -2.61E-01 | 4.58E-01 |
| DGDG(16:0_18:1)         | GL      | DGDG    | -9.39E-01 | 4.90E-05 |
| SQDG(18:2_18:3)         | GL      | SQDG    | -8.36E-01 | 2.93E-03 |
| DGDG(16:0_16:0)         | GL      | DGDG    | -9.66E-01 | 4.82E-06 |
| CL(18:3_18:2_14:0_22:6) | PL      | CL      | -3.52E-01 | 3.16E-01 |
| PE(24:1_18:3)           | PL      | PE      | 2.38E-01  | 5.18E-01 |
| MGDG(16:1_18:1)         | GL      | MGDG    | -8.91E-01 | 4.98E-04 |
| MGDG(16:1_16:3)         | GL      | MGDG    | -8.20E-01 | 3.39E-03 |
| PI(16:1_18:3)           | PL      | PI      | 5.77E-01  | 8.05E-02 |
| SQDG(16:1_18:3)         | GL      | SQDG    | -3.32E-01 | 3.53E-01 |
| DGDG(18:3_20:3)         | GL      | DGDG    | 3.82E-02  | 9.17E-01 |
| TG(18:0_16:0_18:3)      | TG      | TG      | -3.13E-01 | 3.87E-01 |
| PG(16:1_18:3)           | PL      | PG      | -7.54E-02 | 8.33E-01 |
| MGDG(16:3_18:3)         | GL      | MGDG    | -6.98E-01 | 2.42E-02 |
| MGDG(16:2_18:3)         | GL      | MGDG    | -8.85E-01 | 6.97E-04 |
| MGDG(16:0_18:1)         | GL      | MGDG    | -8.29E-01 | 2.88E-03 |
| CerG1(d18:1+hO_25:0+O)  | Cer     | CerG1   | -2.98E-01 | 4.01E-01 |
| SQDG(18:3_18:3)         | GL      | SQDG    | 6.88E-01  | 2.85E-02 |
| MGDG(16:3_16:3)         | GL      | MGDG    | 4.52E-01  | 1.98E-01 |
| CerG1(d18:1+hO_27:0+O)  | Cer     | CerG1   | -4.85E-01 | 1.59E-01 |
| CerG1(d43:2+2O)         | Cer     | CerG1   | -1.69E-01 | 6.48E-01 |
| DGDG(16:0_18:3)         | GL      | DGDG    | -9.33E-01 | 7.97E-05 |
| Cer(d18:2_27:0+O)       | Cer     | Cer     | -8.55E-02 | 8.00E-01 |
| DG(18:3_18:3)           | DG      | DG      | 5.92E-01  | 6.82E-02 |
| PI(15:0_18:3)           | PL      | PI      | 2.24E-01  | 5.31E-01 |
| PE(18:3_18:3)           | PL      | PE      | -1.04E-01 | 7.86E-01 |
| Cer(d18:2_26:0+O)       | Cer     | Cer     | 3.46E-01  | 3.36E-01 |
| PC(34:6)                | PL      | PC      | 4.92E-01  | 1.42E-01 |
| CL(18:3_18:2_16:1_20:4) | PL      | CL      | -2.64E-01 | 4.58E-01 |
| DGDG(18:3_19:2)         | GL      | DGDG    | 4.33E-01  | 2.05E-01 |
| MGDG(18:3_20:3)         | GL      | MGDG    | 7.11E-02  | 8.61E-01 |
| PE(24:1_18:2)           | PL      | PE      | 5.61E-01  | 9.48E-02 |
| MGDG(17:3_18:3)         | GL      | MGDG    | 4.28E-01  | 2.18E-01 |
| PC(34:5)                | PL      | PC      | 5.26E-01  | 1.18E-01 |
| DG(16:0_18:3)           | DG      | DG      | 7.34E-01  | 1.42E-02 |
| PG(16:1_18:1)           | PL      | PG      | -3.19E-01 | 3.83E-01 |
| CerG1(d18:1+hO_23:0+O)  | Cer     | CerG1   | -7.91E-02 | 8.37E-01 |
| DGDG(16:0_18:0)         | GL      | DGDG    | -8.90E-01 | 5.32E-04 |
| PC(16:1_18:3)           | PL      | PC      | 2.96E-01  | 4.18E-01 |
| DG(18:3_18:2)           | DG      | DG      | 5.88E-01  | 7.42E-02 |
| DGDG(17:0_18:2)         | GL      | DGDG    | -7.86E-01 | 7.12E-03 |
| PC(38:4)                | PL      | PC      | 1.09E-02  | 9.92E-01 |
| TG(16:0_18:1_18:1)      | TG      | TG      | -7.44E-01 | 1.43E-02 |
| TG(18:1_18:1_18:2)      | TG      | TG      | -2.49E-01 | 4.89E-01 |
| PE(26:0_18:2)           | PL      | PE      | -5.84E-02 | 8.81E-01 |
| PI(18:3_18:3)           | GL      | PI      | 6.83E-01  | 2.80E-02 |
| MGDG(18:3_20:2)         | GL      | MGDG    | 2.48E-01  | 5.01E-01 |
| PG(16:0_16:0)           | PL      | PG      | 6.01E-01  | 5.83E-02 |
| PE(18:3_18:2)           | PL      | PE      | 1.19E-01  | 7.43E-01 |
| CL(70:5)                | PL      | CL      | 7.31E-01  | 1.55E-02 |
| PG(18:4_18:3)           | PL      | PG      | 7.93E-01  | 6.81E-03 |
| TG(18:1_18:1_18:1)      | TG      | TG      | -8.23E-01 | 3.66E-03 |
| PE(22:0_18:3)           | PL      | PE      | 6.93E-01  | 2.55E-02 |
| DGDG(17:0_18:3)         | GL      | DGDG    | -3.76E-01 | 2.81E-01 |
| PI(16:0_18:2)           | PL      | PI      | 9.07E-02  | 8.00E-01 |
| PE(16:0_18:3)           | PL      | PE      | 5.63E-01  | 8.70E-02 |
| Cer(d18:1+hO_26:0)      | Cer     | Cer     | -3.77E-02 | 9.06E-01 |
| DGDG(18:3_20:0)         | GL      | DGDG    | 4.31E-01  | 2.10E-01 |
| DGDG(16:2_18:3)         | GL      | DGDG    | 1.97E-01  | 5.95E-01 |
| PC(16:0_18:3)           | PL      | PC      | 2.71E-01  | 4.35E-01 |
| PC(33:1)                | PL      | PC      | 5.66E-01  | 9.36E-02 |
| MGDG(18:2_18:3)         | GL      | MGDG    | -1.18E-01 | 7.73E-01 |
| TG(18:0_16:0_18:1)      | TG      | TG      | -5.67E-01 | 8.74E-02 |
| MGDG(18:1_18:3)         | GL      | MGDG    | -8.90E-01 | 5.47E-04 |
| DG(24:0_18:2)           | DG      | DG      | 5.51E-01  | 9.57E-02 |
| AGlcSiE(18:3)           | AGlcSiE | AGlcSiE | -6.54E-01 | 3.71E-02 |
| PC(33:2)                | PL      | PC      | 6.30E-01  | 5.30E-02 |
| MGDG(18:3_19:2)         | GL      | MGDG    | 7.96E-01  | 5.54E-03 |
| PC(33:3)                | PL      | PC      | 6.06E-01  | 6.38E-02 |
| So(d22:0+pO)            | Sterols | So      | -1.25E-01 | 7.53E-01 |
| DG(15:0_18:2)           | DG      | DG      | 5.45E-01  | 1.05E-01 |
| PC(18:3_18:3)           | PL      | PC      | 2.30E-01  | 5.06E-01 |
| PC(18:3_18:2)           | PL      | PC      | 2.25E-01  | 5.33E-01 |
| PE(20:2_18:2)           | PL      | PE      | 4.85E-01  | 1.62E-01 |
| CerG1(d42:2+2O)         | Cer     | CerG1   | 5.30E-01  | 1.17E-01 |
| TG(16:0_16:0_18:1)      | TG      | TG      | -5.07E-01 | 1.37E-01 |
| PE(18:2_18:2)           | PL      | PE      | 2.63E-01  | 4.65E-01 |
| PC(32:1)                | PL      | PC      | 1.69E-01  | 6.39E-01 |
| DGDG(18:3_18:3)         | GL      | DGDG    | 3.85E-01  | 2.67E-01 |
| Cer(d18:1+hO_25:0)      | Cer     | Cer     | 7.88E-01  | 6.78E-03 |
| CerG1(d18:1+hO_24:0+O)  | Cer     | CerG1   | 4.18E-01  | 2.30E-01 |
| PE(17:0_18:2)           | PL      | PE      | 6.36E-01  | 4.70E-02 |
| DG(18:1_18:3)           | DG      | DG      | 3.67E-01  | 3.08E-01 |
| WE(5:0_17:3)            | WE      | WE      | -3.75E-01 | 2.97E-01 |
| DG(18:0_20:0)           | DG      | DG      | -3.82E-01 | 2.77E-01 |
| DG(18:1_18:2)           | DG      | DG      | 6.64E-01  | 3.67E-02 |
| PE(24:0_18:2)           | PL      | PE      | 6.50E-01  | 4.12E-02 |
| DG(18:0_18:0)           | DG      | DG      | -1.49E-01 | 6.88E-01 |
| DG(16:0_16:0)           | DG      | DG      | -1.47E-01 | 6.93E-01 |
| PI(18:0_18:2)           | PL      | PI      | 2.14E-01  | 5.58E-01 |
| DGDG(18:1_18:3)         | GL      | DGDG    | -9.00E-01 | 3.19E-04 |
| MGDG(18:0_18:2)         | GL      | MGDG    | -6.88E-01 | 2.72E-02 |
| CL(18:2_16:0_16:0_20:1) | PL      | CL      | 6.93E-01  | 2.71E-02 |
| Cer(d18:0+pO_26:0)      | Cer     | Cer     | -5.24E-01 | 1.16E-01 |
| PE(22:0_18:2)           | PL      | PE      | 6.58E-01  | 3.85E-02 |
| So(d20:0+pO)            | Sterols | So      | 6.91E-02  | 8.28E-01 |
| PE(15:0_18:2)           | PL      | PE      | 6.31E-01  | 5.07E-02 |
| PI(18:3_18:2)           | PL      | PI      | 5.21E-01  | 1.21E-01 |
| PE(16:0_18:2)           | PL      | PE      | 5.95E-01  | 7.06E-02 |
| TG(18:0_16:0_18:0)      | TG      | TG      | -6.37E-01 | 5.03E-02 |
| PE(18:0_18:3)           | PL      | PE      | -6.08E-02 | 8.61E-01 |
| DG(16:0_18:1)           | DG      | DG      | 3.18E-01  | 3.77E-01 |
| DG(16:0_18:2)           | DG      | DG      | 6.40E-01  | 4.39E-02 |
| DG(18:0_16:0)           | DG      | DG      | -2.89E-01 | 4.25E-01 |
| StE(30:3)               | Sterols | StE     | 4.83E-01  | 1.54E-01 |
| CerG1(d18:1+hO_22:0+O)  | Cer     | CerG1   | 6.14E-01  | 5.81E-02 |
| PC(16:0_18:1)           | PL      | PC      | -8.36E-02 | 8.00E-01 |
| PI(16:0_18:1)           | PL      | PI      | 1.97E-01  | 5.96E-01 |
| AGlcSiE(18:2)           | AGlcSiE | AGlcSiE | 4.84E-02  | 9.10E-01 |
| DG(18:0_18:2)           | DG      | DG      | 4.32E-01  | 2.17E-01 |
| AGlcSiE(18:1)           | AGlcSiE | AGlcSiE | -2.36E-01 | 4.99E-01 |
| DG(17:0_18:2)           | DG      | DG      | 7.13E-01  | 1.98E-02 |
| CerG1(d18:1+hO_28:0+O)  | Cer     | CerG1   | 3.50E-01  | 3.19E-01 |
| TG(18:0_18:0_18:0)      | TG      | TG      | -7.11E-01 | 2.32E-02 |
| PG(18:3_18:3)           | PL      | PG      | 9.69E-01  | 4.46E-06 |
| PE(18:0_18:2)           | PL      | PE      | 5.37E-01  | 1.12E-01 |
| TG(18:0_16:0_16:0)      | TG      | TG      | -6.58E-01 | 4.18E-02 |

|                    |         |         |           |          |
|--------------------|---------|---------|-----------|----------|
| PG(16:1_18:2)      | PL      | PG      | 9.18E-01  | 1.62E-04 |
| AGlcSiE(18:0)      | AGlcSiE | AGlcSiE | 6.34E-01  | 5.24E-02 |
| MGDG(18:3_18:3)    | GL      | MGDG    | 8.70E-01  | 1.07E-03 |
| DGDG(18:0_18:3)    | GL      | DGDG    | 1.27E-01  | 7.27E-01 |
| PG(18:3_18:2)      | PL      | PG      | 8.54E-01  | 1.74E-03 |
| DG(18:4_18:3)      | DG      | DG      | 4.26E-01  | 2.20E-01 |
| MGDG(18:0_18:3)    | GL      | MGDG    | -4.79E-01 | 1.58E-01 |
| Cer(d18:1+hO_24:0) | Cer     | Cer     | 8.06E-01  | 5.31E-03 |
| Cer(d18:2_24:0+O)  | Cer     | Cer     | 9.11E-01  | 2.67E-04 |
| PC(18:0_18:2)      | PL      | PC      | 6.25E-02  | 8.84E-01 |
| PS(39:1)           | PL      | PS      | -8.01E-02 | 8.06E-01 |
| TG(16:0_14:0_16:0) | TG      | TG      | -3.33E-01 | 3.61E-01 |
| AGlcSiE(16:0)      | AGlcSiE | AGlcSiE | 8.34E-01  | 2.99E-03 |
| TG(16:0_16:0_16:0) | TG      | TG      | -3.75E-01 | 3.00E-01 |
| DGDG(18:0_18:1)    | GL      | DGDG    | 5.76E-02  | 8.89E-01 |
| PC(17:1_17:1)      | PL      | PC      | 7.44E-01  | 1.46E-02 |
| MGDG(18:3_20:1)    | GL      | MGDG    | 9.17E-01  | 1.73E-04 |
| PE(16:0_18:1)      | PL      | PE      | 5.28E-01  | 1.24E-01 |
| PC(38:3)           | PL      | PC      | 5.60E-01  | 1.01E-01 |
| PC(18:1_18:3)      | PL      | PC      | -8.03E-02 | 8.01E-01 |

**Table S3** : List of  $p_{\text{corr}}$  from OPLS-DA and  $P$ -value from Welsch T-test of *Nicotiana sylvestris* leaf samples CMSII vs WT.

| ID                   | cat | family | pvalue   | pcorr     |                        |         |         |          |           |
|----------------------|-----|--------|----------|-----------|------------------------|---------|---------|----------|-----------|
| PA.18.2_18.2.N       | PL  | PA     | 1.39E-09 | -9.44E-01 | SQDG.18.3_18.3.        | GL      | SQDG    | 1.97E-04 | -7.32E-01 |
| CerG1.d18.2_28.0_O.  | Cer | CerG1  | 3.79E-09 | -9.41E-01 | TG.16.0_18.2_18.2.     | TG      | TG      | 1.52E-04 | -7.30E-01 |
| PA.18.3_18.2.        | PL  | PA     | 4.16E-09 | -9.34E-01 | PMe.18.2_18.2.         | PL      | PMe     | 1.91E-04 | -7.24E-01 |
| MGDG.18.2_18.3.      | GL  | MGDG   | 2.10E-08 | -9.16E-01 | Cer.d18.0_pO_24.0.     | Cer     | Cer     | 6.32E-04 | -7.24E-01 |
| Cer.d46.1_hO_O.      | Cer | Cer    | 1.44E-07 | -9.11E-01 | PG.16.1_18.2.N         | PL      | PG      | 4.87E-04 | -7.21E-01 |
| CerG1.d18.2_29.0_O.  | Cer | CerG1  | 9.78E-08 | -9.06E-01 | PE.20.0_18.2.P         | PL      | PE      | 3.50E-04 | -7.20E-01 |
| Cer.d18.1_hO_27.0_O. | Cer | Cer    | 1.59E-07 | -9.05E-01 | PMe.16.1_18.3.         | PL      | PMe     | 6.50E-04 | -7.02E-01 |
| MGDG.18.1_18.3.      | GL  | MGDG   | 4.41E-08 | -9.04E-01 | PE.18.2_18.2_12        | PL      | PE      | 3.93E-04 | -6.98E-01 |
| CerG1.d18.2_26.0_O.  | Cer | CerG1  | 2.07E-07 | -9.02E-01 | PG.18.0_16.0.          | PL      | PG      | 8.83E-04 | -6.94E-01 |
| CerG1.d18.2_24.0_O.  | Cer | CerG1  | 2.42E-07 | -8.98E-01 | PMe.16.0_16.0.         | PL      | PMe     | 9.58E-04 | -6.93E-01 |
| Cer.d18.1_hO_23.0_O. | Cer | Cer    | 4.13E-07 | -8.92E-01 | PG.34.5.               | PL      | PG      | 1.76E-03 | -6.92E-01 |
| Cer.d18.0_pO_22.0_O. | Cer | Cer    | 9.95E-07 | -8.90E-01 | Cer.d18.2_24.0_O.      | Cer     | Cer     | 7.09E-04 | -6.90E-01 |
| Cer.d18.1_hO_24.0_O. | Cer | Cer    | 1.31E-06 | -8.78E-01 | DGDG.16.0_18.0.        | GL      | DGDG    | 1.42E-03 | -6.89E-01 |
| PEt.32.4.            | PL  | PEt    | 2.02E-06 | -8.76E-01 | PA.16.0_18.1.P         | PL      | PA      | 8.94E-04 | -6.89E-01 |
| CerG1.d18.2_25.0_O.  | Cer | CerG1  | 1.25E-06 | -8.71E-01 | Cer.d17.1_hO_25.0.     | Cer     | Cer     | 9.19E-04 | -6.87E-01 |
| MGDG.16.0_18.2.      | GL  | MGDG   | 1.22E-06 | -8.65E-01 | PA.18.1_18.1.          | PL      | PA      | 9.33E-04 | -6.86E-01 |
| CerG1.d18.2_22.0_O.  | Cer | CerG1  | 2.91E-06 | -8.62E-01 | CerG1.d18.1_hO_22.0.   | Cer     | CerG1   | 1.15E-03 | -6.77E-01 |
| PA.16.1_18.3.P       | PL  | PA     | 5.02E-06 | -8.62E-01 | PE.15.0_18.3.          | PL      | PE      | 1.23E-03 | -6.75E-01 |
| Cer.d18.0_pO_24.0_O. | Cer | Cer    | 9.10E-06 | -8.54E-01 | PE.24.0_18.2.          | PL      | PE      | 1.19E-03 | -6.72E-01 |
| CerG1.d18.2_20.0_O.  | Cer | CerG1  | 3.85E-06 | -8.53E-01 | TG.18.0_17.0_18.3.     | TG      | TG      | 8.49E-04 | -6.68E-01 |
| PA.18.2_18.2.P       | PL  | PA     | 2.09E-06 | -8.53E-01 | MGDG.16.3_18.3.        | GL      | MGDG    | 1.95E-03 | -6.67E-01 |
| Cer.d18.1_hO_26.0.   | Cer | Cer    | 5.76E-06 | -8.45E-01 | DGDG.18.3_18.3.        | GL      | DGDG    | 1.46E-03 | -6.67E-01 |
| PA.16.0_18.2.N       | PL  | PA     | 7.79E-06 | -8.43E-01 | PE.18.0_16.1.          | PL      | PE      | 1.48E-03 | -6.64E-01 |
| Cer.d18.0_pO_22.0.   | Cer | Cer    | 1.36E-05 | -8.42E-01 | CerG1.d18.1_hO_26.0_O. | Cer     | CerG1   | 1.50E-03 | -6.64E-01 |
| Cer.d18.1_hO_25.0_O. | Cer | Cer    | 7.54E-06 | -8.40E-01 | CerG1.d18.2_18.0_O.    | Cer     | CerG1   | 2.28E-03 | -6.63E-01 |
| PA.17.0_18.3.        | PL  | PA     | 3.29E-06 | -8.37E-01 | PE.22.0_18.2.          | PL      | PE      | 1.30E-03 | -6.63E-01 |
| Cer.d18.0_pO_26.0.   | Cer | Cer    | 1.61E-05 | -8.36E-01 | DGDG.18.3_20.4.        | GL      | DGDG    | 2.80E-03 | -6.61E-01 |
| Cer.d18.0_pO_26.0_O. | Cer | Cer    | 2.67E-05 | -8.31E-01 | PE.20.0_18.2.N         | PL      | PE      | 1.17E-03 | -6.61E-01 |
| Cer.d17.1_hO_22.0.   | Cer | Cer    | 9.77E-06 | -8.29E-01 | PC.38.4.               | PL      | PC      | 1.69E-03 | -6.60E-01 |
| CerG1.d18.2_31.0_O.  | Cer | CerG1  | 6.37E-06 | -8.29E-01 | PMe.22.0_18.2.         | PL      | PMe     | 1.44E-03 | -6.56E-01 |
| DGDG.16.2_18.3.N     | GL  | DGDG   | 1.80E-05 | -8.20E-01 | PMe.20.0_18.2.         | PL      | PMe     | 1.41E-03 | -6.55E-01 |
| Cer.d18.0_pO_25.0.   | Cer | Cer    | 3.34E-05 | -8.17E-01 | DGDG.16.0_16.3.        | GL      | DGDG    | 2.74E-03 | -6.50E-01 |
| DG.16.0_18.2.        | DG  | DG     | 2.97E-05 | -8.17E-01 | DGDG.18.0_18.2.        | GL      | DGDG    | 2.08E-03 | -6.43E-01 |
| PC.18.2_18.2.P       | PL  | PC     | 9.88E-06 | -8.16E-01 | CerG1.d38.0_O.         | Cer     | CerG1   | 3.26E-03 | -6.43E-01 |
| Cer.d18.1_hO_23.0.   | Cer | Cer    | 2.86E-05 | -8.14E-01 | PMe.16.0_16.1.         | PL      | PMe     | 3.34E-03 | -6.37E-01 |
| PA.18.1_18.2.        | PL  | PA     | 1.44E-05 | -8.11E-01 | PC.36.1.               | PL      | PC      | 2.03E-03 | -6.36E-01 |
| DG.18.1_18.3.        | DG  | DG     | 1.25E-05 | -8.10E-01 | PI.16.0_18.2.P         | PL      | PI      | 3.28E-03 | -6.35E-01 |
| Cer.d18.1_hO_22.0_O. | Cer | Cer    | 3.54E-05 | -8.10E-01 | PE.15.0_18.1.          | PL      | PE      | 2.43E-03 | -6.35E-01 |
| Cer.d18.1_hO_26.0_O. | Cer | Cer    | 4.07E-05 | -8.09E-01 | PI.16.0_18.2.N         | PL      | PI      | 3.16E-03 | -6.34E-01 |
| MGDG.16.0_18.1.      | GL  | MGDG   | 1.82E-05 | -8.09E-01 | TG.18.0_18.2_18.3.     | TG      | TG      | 2.41E-03 | -6.19E-01 |
| MGDG.16.2_18.3_10    | GL  | MGDG   | 2.65E-05 | -8.03E-01 | TG.18.1_18.1_18.2.     | TG      | TG      | 2.62E-03 | -6.18E-01 |
| PG.16.1_18.2.P       | PL  | PG     | 2.85E-05 | -8.01E-01 | PA.18.0_18.1.          | PL      | PA      | 5.52E-03 | -6.18E-01 |
| PG.16.0_18.1.P       | PL  | PG     | 1.79E-05 | -8.00E-01 | PI.16.0_20.5.          | PL      | PI      | 3.70E-03 | -6.11E-01 |
| PG.16.1_18.3.N       | PL  | PG     | 5.85E-05 | -7.93E-01 | DGDG.18.0_18.1.        | GL      | DGDG    | 4.86E-03 | -6.10E-01 |
| PE.18.2_18.2.        | PL  | PE     | 1.51E-05 | -7.90E-01 | TG.18.1_18.2_18.3.     | TG      | TG      | 2.88E-03 | -6.09E-01 |
| DGDG.16.0_18.1.      | GL  | DGDG   | 5.89E-05 | -7.89E-01 | CerG1.d18.1_hO_23.0_O. | Cer     | CerG1   | 4.95E-03 | -6.04E-01 |
| CerG1.d18.2_23.0_O.  | Cer | CerG1  | 3.73E-05 | -7.89E-01 | PC.34.1.               | PL      | PC      | 4.03E-03 | -5.99E-01 |
| DGDG.16.0_18.2.      | GL  | DGDG   | 1.07E-04 | -7.72E-01 | PE.16.0_18.2.P         | PL      | PE      | 6.27E-03 | -5.98E-01 |
| PA.16.0_18.2.P       | PL  | PA     | 8.86E-05 | -7.71E-01 | PA.16.0_16.1.          | PL      | PA      | 8.43E-03 | -5.98E-01 |
| DGDG.18.1_18.3.      | GL  | DGDG   | 7.34E-05 | -7.70E-01 | PA.16.1_18.3.N         | PL      | PA      | 7.34E-03 | -5.97E-01 |
| PA.18.3_18.2_11.1    | PL  | PA     | 5.81E-05 | -7.70E-01 | TG.16.0_18.2_18.3.     | TG      | TG      | 3.26E-03 | -5.96E-01 |
| PE.16.1_18.3.        | PL  | PE     | 5.81E-05 | -7.70E-01 | PG.16.0_16.0.P         | PL      | PG      | 7.07E-03 | -5.94E-01 |
| DGDG.16.3_18.3.      | GL  | DGDG   | 1.08E-04 | -7.67E-01 | PE.18.2_23.0.P         | PL      | PE      | 6.85E-03 | -5.85E-01 |
| CerG1.d44.3_pO.      | Cer | CerG1  | 2.35E-04 | -7.65E-01 | CerG1.d18.1_hO_25.0_O. | Cer     | CerG1   | 5.42E-03 | -5.84E-01 |
| Cer.d17.1_hO_26.0.   | Cer | Cer    | 1.08E-04 | -7.65E-01 | PA.17.0_18.2.          | PL      | PA      | 5.69E-03 | -5.83E-01 |
| CerG1.d42.0_O.       | Cer | CerG1  | 2.76E-04 | -7.60E-01 | PMe.16.0_18.2.         | PL      | PMe     | 5.69E-03 | -5.83E-01 |
| PA.16.0_18.1.N       | PL  | PA     | 1.93E-04 | -7.53E-01 | DGDG.16.0_16.0.N       | GL      | DGDG    | 1.11E-02 | -5.78E-01 |
| Cer.d17.1_hO_23.0.   | Cer | Cer    | 1.60E-04 | -7.51E-01 | PMe.16.0_18.1.         | PL      | PMe     | 6.09E-03 | -5.78E-01 |
| PG.16.0_18.1.N       | PL  | PG     | 1.53E-04 | -7.48E-01 | DG.18.0_18.0.          | DG      | DG      | 1.27E-02 | -5.73E-01 |
| PA.18.0_18.2.        | PL  | PA     | 2.04E-04 | -7.47E-01 | TG.58.4.               | TG      | TG      | 7.04E-03 | -5.69E-01 |
| DGDG.18.2_18.3.      | GL  | DGDG   | 1.52E-04 | -7.46E-01 | TG.18.3_18.2_18.2.     | TG      | TG      | 5.34E-03 | -5.68E-01 |
| PE.37.1.             | PL  | PE     | 1.41E-04 | -7.46E-01 | DG.18.0_16.0.          | DG      | DG      | 1.46E-02 | -5.60E-01 |
| DGDG.16.2_18.3.P     | GL  | DGDG   | 2.36E-04 | -7.43E-01 | PMe.18.0_18.2.         | PL      | PMe     | 7.89E-03 | -5.60E-01 |
| PC.38.1.             | PL  | PC     | 1.38E-04 | -7.42E-01 | DGDG.16.0_16.0.P       | GL      | DGDG    | 1.48E-02 | -5.57E-01 |
| PI.18.3_18.2.        | PL  | PI     | 1.65E-04 | -7.39E-01 | CerG1.d43.3_pO.        | Cer     | CerG1   | 1.84E-02 | -5.55E-01 |
| DG.18.0_18.2.        | DG  | DG     | 3.21E-04 | -7.34E-01 | TG.17.0_18.2_18.2.     | TG      | TG      | 6.69E-03 | -5.51E-01 |
| PG.16.1_18.3.P       | PL  | PG     | 2.78E-04 | -7.32E-01 | TG.19.0_18.2_18.2.     | TG      | TG      | 9.58E-03 | -5.50E-01 |
|                      |     |        |          |           | PE.16.0_18.1.          | PL      | PE      | 9.71E-03 | -5.50E-01 |
|                      |     |        |          |           | AGlcSiE.18.1.          | AGlcSiE | AGlcSiE | 1.36E-02 | -5.38E-01 |
|                      |     |        |          |           | DG.18.0_18.1.          | DG      | DG      | 1.79E-02 | -5.36E-01 |
|                      |     |        |          |           | CerG1.d18.1_hO_22.0_O. | Cer     | CerG1   | 1.42E-02 | -5.36E-01 |
|                      |     |        |          |           | PE.17.1_18.0.          | PL      | PE      | 1.29E-02 | -5.35E-01 |
|                      |     |        |          |           | DG.16.0_18.1.          | DG      | DG      | 1.74E-02 | -5.33E-01 |



|                        |         |         |          |           |                     |         |         |          |           |
|------------------------|---------|---------|----------|-----------|---------------------|---------|---------|----------|-----------|
| SQDG.30.0.             | GL      | SQDG    | 2.00E-02 | -5.29E-01 | PA.15.0_18.3.P      | PL      | PA      | 8.11E-01 | -5.27E-02 |
| DGDG.16.0_18.3.        | GL      | DGDG    | 2.26E-02 | -5.27E-01 | DGDG.18.0_18.3.     | GL      | DGDG    | 8.91E-01 | -3.45E-02 |
| CerG1.d18.2_16.0_O.    | Cer     | CerG1   | 2.13E-02 | -5.26E-01 | TG.17.0_18.2_18.3.  | TG      | TG      | 7.52E-01 | -3.35E-02 |
| SQDG.16.0_16.0.        | GL      | SQDG    | 2.26E-02 | -5.24E-01 | LPMe.18.2.          | PL      | LPMe    | 8.43E-01 | -2.67E-02 |
| DGDG.16.1_18.3.        | GL      | DGDG    | 1.88E-02 | -5.23E-01 | TG.4.0_10.1_13.0.   | TG      | TG      | 9.89E-01 | -2.32E-02 |
| PG.16.0_16.0.N         | PL      | PG      | 2.24E-02 | -5.23E-01 | LPC.18.2.P          | PL      | LPC     | 8.93E-01 | -1.84E-02 |
| MGDG.16.0_16.2.        | GL      | MGDG    | 3.08E-02 | -5.12E-01 | AGlcSiE.16.0.       | AGlcSiE | AGlcSiE | 9.76E-01 | -1.74E-02 |
| TG.22.0_18.2_18.3.     | TG      | TG      | 1.67E-02 | -5.07E-01 | LPC.20.0.           | PL      | LPC     | 8.95E-01 | -1.57E-02 |
| AGlcSiE.17.0.          | AGlcSiE | AGlcSiE | 2.46E-02 | -5.07E-01 | LPA.18.1.           | PL      | LPA     | 9.42E-01 | -8.12E-03 |
| PE.17.1_18.3.          | PL      | PE      | 2.09E-02 | -4.99E-01 | LPMe.17.1.          | PL      | LPMe    | 9.46E-01 | -6.83E-03 |
| DGDG.17.3_18.3.        | GL      | DGDG    | 2.32E-02 | -4.98E-01 | PE.17.0_18.2.P      | PL      | PE      | 9.74E-01 | -5.80E-03 |
| SQDG.16.0_18.3.        | GL      | SQDG    | 2.65E-02 | -4.96E-01 | LPG.18.2.P          | PL      | LPG     | 9.76E-01 | -2.44E-03 |
| PET.30.1.              | PL      | PET     | 4.09E-02 | -4.94E-01 | TG.18.4_16.1_18.4.  | TG      | TG      | 9.65E-01 | 1.25E-03  |
| PE.20.2_18.2.          | PL      | PE      | 1.92E-02 | -4.92E-01 | PC.16.0_16.0.       | PL      | PC      | 8.99E-01 | 1.39E-03  |
| PA.20.1_18.2.          | PL      | PA      | 2.44E-02 | -4.83E-01 | DG.15.0_18.2.       | DG      | DG      | 8.81E-01 | 1.13E-02  |
| MePC.38.7.             | PL      | MePC    | 4.04E-02 | -4.82E-01 | MGDG.16.0_16.3.     | GL      | MGDG    | 8.24E-01 | 1.42E-02  |
| CerG1.d34.3_20.        | Cer     | CerG1   | 4.41E-02 | -4.75E-01 | PMe.20.0_18.3.      | PL      | PMe     | 9.91E-01 | 1.49E-02  |
| PI.16.0_18.3.P         | PL      | PI      | 3.23E-02 | -4.75E-01 | MGDG.18.0_18.1.     | GL      | MGDG    | 9.67E-01 | 1.70E-02  |
| DG.16.0_16.0.          | DG      | DG      | 5.27E-02 | -4.68E-01 | DGDG.17.0_18.3.     | GL      | DGDG    | 9.02E-01 | 1.80E-02  |
| MGDG.18.3_20.2.        | GL      | MGDG    | 3.71E-02 | -4.65E-01 | DGDG.18.3_19.1.     | GL      | DGDG    | 9.42E-01 | 2.47E-02  |
| PC.18.2_18.2.N         | PL      | PC      | 3.65E-02 | -4.65E-01 | LPC.22.0.           | PL      | LPC     | 9.90E-01 | 2.91E-02  |
| SQDG.36.5.             | GL      | SQDG    | 5.07E-02 | -4.56E-01 | LPA.16.1.           | PL      | LPA     | 7.74E-01 | 5.35E-02  |
| PMe.18.0_18.1.         | PL      | PMe     | 3.48E-02 | -4.54E-01 | TG.18.3_18.2_18.3.  | TG      | TG      | 9.57E-01 | 5.59E-02  |
| MGDG.18.0_18.2.        | GL      | MGDG    | 5.02E-02 | -4.33E-01 | DGDG.18.3_20.0.     | GL      | DGDG    | 8.78E-01 | 5.96E-02  |
| PG.16.0_16.1.P         | PL      | PG      | 7.61E-02 | -4.20E-01 | PG.33.1.            | PL      | PG      | 7.60E-01 | 6.22E-02  |
| PMe.18.3_18.2.         | PL      | PMe     | 5.38E-02 | -4.13E-01 | PC.16.0_17.0.       | PL      | PC      | 7.25E-01 | 7.02E-02  |
| PE.16.0p.              | PL      | PE      | 7.14E-02 | -4.13E-01 | DGDG.39.7.          | GL      | DGDG    | 6.42E-01 | 8.93E-02  |
| PE.16.0_18.2.N         | PL      | PE      | 6.81E-02 | -4.11E-01 | MGDG.18.3_20.3.     | GL      | MGDG    | 6.22E-01 | 1.06E-01  |
| AGlcSiE.15.0.          | AGlcSiE | AGlcSiE | 7.95E-02 | -4.10E-01 | LPC.18.1.P          | PL      | LPC     | 7.01E-01 | 1.09E-01  |
| TG.24.0_18.2_18.3.     | TG      | TG      | 5.85E-02 | -4.03E-01 | PE.15.0_18.2.       | PL      | PE      | 6.63E-01 | 1.12E-01  |
| CerG1.d18.2_16.0.      | Cer     | CerG1   | 8.84E-02 | -3.99E-01 | SQMG.18.1.          | GL      | SQMG    | 7.33E-01 | 1.15E-01  |
| PG.16.1_18.1.P         | PL      | PG      | 7.62E-02 | -3.97E-01 | DG.19.0_18.2.       | DG      | DG      | 5.89E-01 | 1.21E-01  |
| PE.18.2_23.0.N         | PL      | PE      | 8.36E-02 | -3.89E-01 | PC.34.5.            | PL      | PC      | 6.34E-01 | 1.22E-01  |
| PG.16.1_18.1.N         | PL      | PG      | 9.42E-02 | -3.81E-01 | DG.25.0_18.2.       | DG      | DG      | 5.99E-01 | 1.23E-01  |
| PI.16.0_18.3.N         | PL      | PI      | 9.97E-02 | -3.79E-01 | Cer.d18.2_16.0_O.   | Cer     | Cer     | 4.71E-01 | 1.40E-01  |
| PC.16.0_18.1.          | PL      | PC      | 1.01E-01 | -3.64E-01 | PC.24.2_10.4.       | PL      | PC      | 4.85E-01 | 1.42E-01  |
| MGDG.18.3_18.3.        | GL      | MGDG    | 1.23E-01 | -3.57E-01 | DGMG.16.3.          | GL      | DGMG    | 4.84E-01 | 1.49E-01  |
| CerG1.d18.1_hO_24.0_O. | Cer     | CerG1   | 1.26E-01 | -3.55E-01 | MGDG.17.2_18.3.     | GL      | MGDG    | 5.21E-01 | 1.57E-01  |
| PE.18.0_18.2.P         | PL      | PE      | 1.15E-01 | -3.43E-01 | AGlcSiE.18.0.       | AGlcSiE | AGlcSiE | 5.02E-01 | 1.61E-01  |
| DG.18.4_16.1.          | DG      | DG      | 1.65E-01 | -3.36E-01 | PE.35.5.            | PL      | PE      | 5.42E-01 | 1.61E-01  |
| PG.16.0_16.1.N         | PL      | PG      | 1.85E-01 | -3.26E-01 | PA.18.3_18.3.P      | PL      | PA      | 4.87E-01 | 1.73E-01  |
| MePC.38.6p.            | PL      | MePC    | 2.40E-01 | -3.24E-01 | PE.34.5.            | PL      | PE      | 4.87E-01 | 1.73E-01  |
| AGlcSiE.16.1.          | AGlcSiE | AGlcSiE | 1.89E-01 | -3.21E-01 | LPMe.18.1.          | PL      | LPMe    | 4.57E-01 | 1.91E-01  |
| TG.18.0_18.0_18.0.     | TG      | TG      | 1.91E-01 | -3.17E-01 | TG.15.0_18.2_18.2.  | TG      | TG      | 4.35E-01 | 2.11E-01  |
| SQDG.36.3.             | GL      | SQDG    | 1.56E-01 | -3.15E-01 | PA.16.0_18.3_11.9   | PL      | PA      | 3.17E-01 | 2.17E-01  |
| PA.20.0_18.2.          | PL      | PA      | 3.28E-01 | -2.91E-01 | PE.16.1_16.1.       | PL      | PE      | 3.17E-01 | 2.17E-01  |
| SQMG.18.2.             | GL      | SQMG    | 2.16E-01 | -2.86E-01 | LPG.18.3.P          | PL      | LPG     | 2.79E-01 | 2.43E-01  |
| AGlcSiE.20.0.          | AGlcSiE | AGlcSiE | 2.25E-01 | -2.82E-01 | DG.18.1_18.2.       | DG      | DG      | 2.76E-01 | 2.48E-01  |
| PC.18.0_18.1.          | PL      | PC      | 2.09E-01 | -2.74E-01 | MGDG.16.0_18.3.     | GL      | MGDG    | 2.56E-01 | 2.51E-01  |
| LPG.16.1.P             | PL      | LPG     | 3.01E-01 | -2.68E-01 | PE.18.3_18.2_11     | PL      | PE      | 3.82E-01 | 2.53E-01  |
| PE.18.0_18.2.N         | PL      | PE      | 2.38E-01 | -2.62E-01 | SiE.18.3_19.6       | Sterol  | SiE     | 2.82E-01 | 2.64E-01  |
| AGlcSiE.25.0.          | AGlcSiE | AGlcSiE | 2.79E-01 | -2.54E-01 | DGDG.38.7.          | GL      | DGDG    | 2.13E-01 | 2.70E-01  |
| LPI.16.0.              | PL      | LPI     | 2.92E-01 | -2.52E-01 | MGDG.17.3_18.3.     | GL      | MGDG    | 2.31E-01 | 2.88E-01  |
| AGlcSiE.23.0.          | AGlcSiE | AGlcSiE | 2.72E-01 | -2.50E-01 | PMe.16.0_18.3.      | PL      | PMe     | 2.17E-01 | 3.02E-01  |
| PE.22.0_18.3.P         | PL      | PE      | 2.49E-01 | -2.48E-01 | PC.24.0_18.3.P      | PL      | PC      | 2.81E-01 | 3.07E-01  |
| LPI.18.2.              | PL      | LPI     | 2.91E-01 | -2.39E-01 | LPG.16.1.N          | PL      | LPG     | 1.67E-01 | 3.16E-01  |
| MGMG.16.2.             | GL      | MGMG    | 3.02E-01 | -2.35E-01 | PA.16.0_18.3.       | PL      | PA      | 1.49E-01 | 3.16E-01  |
| PC.34.0.               | PL      | PC      | 4.46E-01 | -2.00E-01 | LPG.18.2.N          | PL      | LPG     | 1.75E-01 | 3.28E-01  |
| LPA.18.2.              | PL      | LPA     | 3.87E-01 | -1.96E-01 | MGDG.18.3_19.1.     | GL      | MGDG    | 1.63E-01 | 3.30E-01  |
| AGlcSiE.22.0.          | AGlcSiE | AGlcSiE | 4.03E-01 | -1.94E-01 | PA.18.3_18.3.N      | PL      | PA      | 1.41E-01 | 3.46E-01  |
| DG.18.2_23.0.          | DG      | DG      | 4.78E-01 | -1.78E-01 | PS.20.0_18.2.P      | PL      | PS      | 1.07E-01 | 3.52E-01  |
| PC.18.3_18.2.P         | PL      | PC      | 4.03E-01 | -1.72E-01 | TG.12.0e_11.3_11.3. | TG      | TG      | 1.05E-01 | 3.59E-01  |
| PC.32.0.               | PL      | PC      | 5.52E-01 | -1.72E-01 | PC.18.3_18.2.N      | PL      | PC      | 1.29E-01 | 3.61E-01  |
| DG.14.0_18.3.          | DG      | DG      | 5.53E-01 | -1.71E-01 | DGMG.16.0.          | GL      | DGMG    | 7.83E-02 | 3.99E-01  |
| PC.18.0_18.2.          | PL      | PC      | 4.49E-01 | -1.68E-01 | LPMe.16.0.          | PL      | LPMe    | 8.99E-02 | 3.99E-01  |
| PE.18.3_18.2.          | PL      | PE      | 4.07E-01 | -1.60E-01 | PE.22.0_18.3.N      | PL      | PE      | 1.23E-01 | 4.05E-01  |
| PC.18.0_18.3.P         | PL      | PC      | 4.96E-01 | -1.51E-01 | PC.40.3.            | PL      | PC      | 1.26E-01 | 4.14E-01  |
| PC.16.0_18.2.          | PL      | PC      | 5.36E-01 | -1.49E-01 | PE.20.0_18.3.P      | PL      | PE      | 9.07E-02 | 4.24E-01  |
| DGDG.37.7.             | GL      | DGDG    | 5.43E-01 | -1.46E-01 | DG.26.0_18.2.       | DG      | DG      | 6.65E-02 | 4.25E-01  |
| TG.16.0_17.0_18.3.     | TG      | TG      | 4.97E-01 | -1.45E-01 | LPC.16.0.P          | PL      | LPC     | 5.46E-02 | 4.32E-01  |
| MGMG.18.2.             | GL      | MGMG    | 5.18E-01 | -1.37E-01 | TG.16.1_18.3_18.3.  | TG      | TG      | 7.61E-02 | 4.34E-01  |
| DG.17.0_18.2.          | DG      | DG      | 6.50E-01 | -1.29E-01 | PC.33.2.            | PL      | PC      | 6.56E-02 | 4.37E-01  |
| DG.16.0_22.0.          | DG      | DG      | 7.15E-01 | -9.79E-02 | MGDG.16.0_16.0.     | GL      | MGDG    | 4.79E-02 | 4.38E-01  |

|                    |        |       |          |          |                      |         |         |          |          |
|--------------------|--------|-------|----------|----------|----------------------|---------|---------|----------|----------|
| DG.15.0_18.3.      | DG     | DG    | 4.84E-02 | 4.39E-01 | PE.16.0_18.3.P       | PL      | PE      | 7.91E-04 | 7.10E-01 |
| TG.18.3_18.3_20.2. | TG     | TG    | 7.20E-02 | 4.41E-01 | TG.18.3_18.3_20.3.   | TG      | TG      | 6.20E-04 | 7.10E-01 |
| DG.16.0_24.0.      | DG     | DG    | 4.25E-02 | 4.43E-01 | MGMG.16.0.           | GL      | MGMG    | 3.49E-04 | 7.13E-01 |
| PMe.18.3_18.3.     | PL     | PMe   | 6.07E-02 | 4.45E-01 | PC.16.0_18.3.P       | PL      | PC      | 2.42E-04 | 7.28E-01 |
| LPC.18.0.P         | PL     | LPC   | 4.61E-02 | 4.46E-01 | MGMG.18.3.           | GL      | MGMG    | 3.07E-04 | 7.29E-01 |
| MGDG.18.0_18.3.    | GL     | MGDG  | 4.38E-02 | 4.51E-01 | DG.30.0_18.0.        | DG      | DG      | 2.05E-04 | 7.32E-01 |
| TG.18.3_17.1_18.3. | TG     | TG    | 6.61E-02 | 4.57E-01 | TG.18.4_18.3_18.3.   | TG      | TG      | 3.94E-04 | 7.34E-01 |
| LPC.18.1.N         | PL     | LPC   | 5.07E-02 | 4.64E-01 | TG.18.3_13.0_20.4.   | TG      | TG      | 2.90E-04 | 7.37E-01 |
| PMe.18.0_18.3.     | PL     | PMe   | 4.45E-02 | 4.66E-01 | AGlcSiE.18.3.        | AGlcSiE | AGlcSiE | 2.25E-04 | 7.38E-01 |
| PA.15.0_18.3.N     | PL     | PA    | 3.79E-02 | 4.70E-01 | LPE.18.0.            | PL      | LPE     | 2.75E-04 | 7.39E-01 |
| DG.22.0_18.2.      | DG     | DG    | 4.01E-02 | 4.70E-01 | DG.24.0_18.3.        | DG      | DG      | 2.42E-04 | 7.46E-01 |
| DG.18.1_24.0.      | DG     | DG    | 3.64E-02 | 4.72E-01 | DG.28.0_16.0.        | DG      | DG      | 6.29E-05 | 7.54E-01 |
| LPG.18.0.          | PL     | LPG   | 3.49E-02 | 4.72E-01 | StE.18.3.            | Sterol  | StE     | 2.27E-04 | 7.56E-01 |
| TG.16.0_16.1_18.3. | TG     | TG    | 4.06E-02 | 4.77E-01 | MGDG.16.0_18.0.      | GL      | MGDG    | 1.63E-04 | 7.57E-01 |
| PE.38.5.           | PL     | PE    | 5.30E-02 | 4.79E-01 | LPG.18.1.N           | PL      | LPG     | 2.62E-04 | 7.58E-01 |
| DGDG.18.3_19.0.    | GL     | DGDG  | 3.08E-02 | 4.86E-01 | DGMG.18.3.           | GL      | DGMG    | 1.45E-04 | 7.59E-01 |
| DG.24.0_18.2.      | DG     | DG    | 3.26E-02 | 4.86E-01 | DG.22.0_18.3.        | DG      | DG      | 1.58E-04 | 7.62E-01 |
| DGDG.18.2_24.0.    | GL     | DGDG  | 4.82E-02 | 4.89E-01 | PS.20.0_18.3.P       | PL      | PS      | 7.22E-05 | 7.64E-01 |
| TG.15.0_18.2_18.3. | TG     | TG    | 3.48E-02 | 5.04E-01 | DG.19.1_18.3.        | DG      | DG      | 6.72E-05 | 7.66E-01 |
| LPG.16.0.          | PL     | LPG   | 2.42E-02 | 5.08E-01 | DG.30.0_16.0.        | DG      | DG      | 4.87E-05 | 7.67E-01 |
| DG.16.0_16.1.      | DG     | DG    | 1.70E-02 | 5.08E-01 | LPA.18.0.            | PL      | LPA     | 5.10E-05 | 7.71E-01 |
| LPC.18.2.N         | PL     | LPC   | 2.65E-02 | 5.14E-01 | MGMG.18.0.           | GL      | MGMG    | 5.31E-05 | 7.74E-01 |
| TG.16.0_18.3_18.3. | TG     | TG    | 2.65E-02 | 5.14E-01 | PC.32.3.             | PL      | PC      | 9.59E-05 | 7.77E-01 |
| LPE.18.2.          | PL     | LPE   | 2.69E-02 | 5.16E-01 | LPC.16.0.N           | PL      | LPC     | 7.71E-05 | 7.77E-01 |
| PE.17.0_18.2.N     | PL     | PE    | 3.56E-02 | 5.17E-01 | DG.18.3_23.0.        | DG      | DG      | 6.07E-05 | 7.79E-01 |
| DGDG.18.2_22.0.    | GL     | DGDG  | 4.02E-02 | 5.18E-01 | DG.16.0_18.3.        | DG      | DG      | 3.60E-05 | 7.80E-01 |
| PC.8.0e_16.0.      | PL     | PC    | 2.74E-02 | 5.27E-01 | LPC.18.0.N           | PL      | LPC     | 7.29E-05 | 7.80E-01 |
| LPC.24.0.          | PL     | LPC   | 2.53E-02 | 5.33E-01 | LPS.18.2.            | PL      | LPS     | 4.15E-05 | 7.83E-01 |
| StE.18.2.          | Sterol | StE   | 2.78E-02 | 5.39E-01 | ChE.18.3.            | Sterol  | ChE     | 4.33E-05 | 7.97E-01 |
| TG.17.0_18.3_18.3. | TG     | TG    | 1.72E-02 | 5.43E-01 | PE.16.0_18.3.N       | PL      | PE      | 4.56E-05 | 7.99E-01 |
| DG.16.1_18.3.      | DG     | DG    | 8.08E-03 | 5.57E-01 | ChE.18.2.            | Sterol  | ChE     | 5.33E-05 | 8.00E-01 |
| MGMG.16.1.         | GL     | MGMG  | 1.56E-02 | 5.60E-01 | LPC.17.0.            | PL      | LPC     | 2.39E-05 | 8.10E-01 |
| dMePE.18.3_18.2.   | PL     | dMePE | 1.67E-02 | 5.60E-01 | DG.17.0_18.3.        | DG      | DG      | 1.19E-05 | 8.13E-01 |
| PE.20.3_18.2.      | PL     | PE    | 1.67E-02 | 5.60E-01 | PS.20.0_18.3.N       | PL      | PS      | 8.58E-06 | 8.14E-01 |
| DG.18.4_18.3.      | DG     | DG    | 9.76E-03 | 5.65E-01 | PE.18.3_18.3_8       | PL      | PE      | 2.46E-05 | 8.15E-01 |
| LPG.18.1.P         | PL     | LPG   | 1.13E-02 | 5.69E-01 | PC.33.3.             | PL      | PC      | 1.56E-05 | 8.23E-01 |
| DG.26.0_16.0.      | DG     | DG    | 6.45E-03 | 5.71E-01 | PC.16.0_18.3.N       | PL      | PC      | 7.17E-06 | 8.26E-01 |
| DG.18.3_20.3.      | DG     | DG    | 7.69E-03 | 5.71E-01 | PE.18.0_18.3.P       | PL      | PE      | 8.85E-06 | 8.39E-01 |
| PC.33.1.           | PL     | PC    | 8.68E-03 | 5.73E-01 | PE.18.3_18.3.        | PL      | PE      | 1.39E-05 | 8.40E-01 |
| MGMG.16.3.         | GL     | MGMG  | 7.13E-03 | 5.75E-01 | LPI.18.3.            | PL      | LPI     | 8.18E-06 | 8.40E-01 |
| LPG.18.3.N         | PL     | LPG   | 9.49E-03 | 5.75E-01 | DG.19.0_18.3.        | DG      | DG      | 1.51E-06 | 8.48E-01 |
| PC.19.0_18.2.      | PL     | PC    | 9.33E-03 | 5.87E-01 | PC.18.0_18.3.N       | PL      | PC      | 2.54E-06 | 8.50E-01 |
| SQMG.18.0.         | GL     | SQMG  | 7.17E-03 | 5.94E-01 | PC.19.1_16.0.        | PL      | PC      | 3.49E-06 | 8.60E-01 |
| DG.18.3_18.3.      | DG     | DG    | 5.25E-03 | 5.98E-01 | SQMG.18.3.           | GL      | SQMG    | 1.60E-06 | 8.62E-01 |
| PE.18.3_20.2.      | PL     | PE    | 1.16E-02 | 5.99E-01 | LPS.18.3.            | PL      | LPS     | 8.87E-07 | 8.66E-01 |
| DG.19.1_16.0.      | DG     | DG    | 3.62E-03 | 6.10E-01 | PS.16.0_18.3.        | PL      | PS      | 3.68E-07 | 8.79E-01 |
| LPE.16.0.          | PL     | LPE   | 5.03E-03 | 6.14E-01 | PE.17.0_18.3.        | PL      | PE      | 1.24E-06 | 8.79E-01 |
| LPMe.18.3.         | PL     | LPMe  | 3.46E-03 | 6.15E-01 | LPE.18.3.            | PL      | LPE     | 7.57E-07 | 8.81E-01 |
| PS.20.0_18.2.N     | PL     | PS    | 2.15E-03 | 6.23E-01 | CerG1.d18.1_hO_24.0. | Cer     | CerG1   | 8.82E-07 | 8.83E-01 |
| CerG1.d43.0_pO_20. | Cer    | CerG1 | 3.94E-03 | 6.26E-01 | PC.18.3_18.3.N       | PL      | PC      | 2.57E-07 | 8.87E-01 |
| PE.20.0_18.3.N     | PL     | PE    | 5.66E-03 | 6.32E-01 | PS.18.0_18.3.        | PL      | PS      | 1.16E-07 | 8.88E-01 |
| PC.16.0_16.1.      | PL     | PC    | 2.89E-03 | 6.37E-01 | MGDG.18.3_24.0.      | GL      | MGDG    | 7.81E-07 | 8.89E-01 |
| MGDG.16.0_22.0.    | GL     | MGDG  | 3.80E-03 | 6.40E-01 | PC.18.3_18.3.P       | PL      | PC      | 1.91E-07 | 8.92E-01 |
| DG.17.1_18.3.      | DG     | DG    | 2.30E-03 | 6.40E-01 | LPC.18.3.N           | PL      | LPC     | 8.24E-08 | 9.05E-01 |
| PE.18.0_18.3.N     | PL     | PE    | 3.98E-03 | 6.44E-01 | PC.19.0_18.3.        | PL      | PC      | 4.44E-09 | 9.28E-01 |
| SiE.18.2.          | Sterol | SiE   | 3.33E-03 | 6.53E-01 | LPC.18.3.P           | PL      | LPC     | 1.53E-09 | 9.35E-01 |
| SQMG.16.0.         | GL     | SQMG  | 1.98E-03 | 6.54E-01 | PC.17.0_18.3.        | PL      | PC      | 8.40E-09 | 9.38E-01 |
| StE.25.2.          | Sterol | StE   | 1.70E-03 | 6.57E-01 | PC.15.0_18.3.        | PL      | PC      | 3.80E-09 | 9.41E-01 |
| TG.53.9.           | TG     | TG    | 1.79E-03 | 6.65E-01 |                      |         |         |          |          |
| PC.35.1.           | PL     | PC    | 2.05E-03 | 6.67E-01 |                      |         |         |          |          |
| TG.14.0_18.3_18.3. | TG     | TG    | 1.16E-03 | 6.70E-01 |                      |         |         |          |          |
| MGDG.16.0_24.0.    | GL     | MGDG  | 1.91E-03 | 6.72E-01 |                      |         |         |          |          |
| TG.18.3_18.3_18.3. | TG     | TG    | 1.53E-03 | 6.78E-01 |                      |         |         |          |          |
| TG.15.0_18.3_18.3. | TG     | TG    | 1.45E-03 | 6.78E-01 |                      |         |         |          |          |
| MGDG.17.0_18.3.    | GL     | MGDG  | 8.72E-04 | 6.80E-01 |                      |         |         |          |          |
| DG.20.0_18.3.      | DG     | DG    | 8.53E-04 | 6.85E-01 |                      |         |         |          |          |
| TG.19.1_18.3_18.3. | TG     | TG    | 1.44E-03 | 6.89E-01 |                      |         |         |          |          |
| LPA.16.0.          | PL     | LPA   | 7.02E-04 | 6.89E-01 |                      |         |         |          |          |
| LPMe.15.0.         | PL     | LPMe  | 6.94E-04 | 6.89E-01 |                      |         |         |          |          |
| LPA.18.3.          | PL     | LPA   | 7.73E-04 | 6.92E-01 |                      |         |         |          |          |
| PC.24.0_18.3.N     | PL     | PC    | 2.31E-03 | 7.02E-01 |                      |         |         |          |          |
| PC.20.1_18.2.      | PL     | PC    | 7.37E-04 | 7.03E-01 |                      |         |         |          |          |
| PC.17.0_18.2.      | PL     | PC    | 7.06E-04 | 7.08E-01 |                      |         |         |          |          |

**Table S4** : List of  $p_{\text{corr}}$  from OPLS-DA and  $P$ -value from Welsch T-test of *Arabidopsis thaliana* seed samples *ndufs4* vs Col0

| ID                | family  | cat     | pcorr     | pvalue   |                        |         |         |           |          |
|-------------------|---------|---------|-----------|----------|------------------------|---------|---------|-----------|----------|
| DGMG(18:2)        | DGMG    | GL      | -9.97E-01 | 1.03E-09 | PI(34:5)               | PI      | PL      | -9.00E-01 | 1.39E-04 |
| DGDG(18:3_20:3)   | DGDG    | GL      | -9.96E-01 | 1.57E-09 | WE(3:0_20:3)           | WE      | WE      | -9.00E-01 | 2.16E-04 |
| LPC(20:2)         | LPC     | PL      | -9.95E-01 | 4.16E-10 | PE(22:0_18:2)          | PE      | PL      | -8.99E-01 | 1.19E-04 |
| DGDG(18:3_20:2)   | DGDG    | GL      | -9.93E-01 | 3.91E-08 | PC(40:4)               | PC      | PL      | -8.96E-01 | 1.83E-04 |
| DGDG(18:2_20:1)   | DGDG    | GL      | -9.92E-01 | 2.04E-08 | DG(16:0_18:2)          | DG      | DG      | -8.95E-01 | 2.62E-04 |
| LPC(20:3)         | LPC     | PL      | -9.91E-01 | 4.97E-09 | Cer(d18:0+pO_24:0)     | Cer     | Cer     | -8.90E-01 | 4.64E-04 |
| LPE(20:1)         | LPE     | PL      | -9.91E-01 | 2.34E-09 | PE(17:1_16:0)          | PE      | PL      | -8.88E-01 | 3.14E-04 |
| LPC(20:1)         | LPC     | PL      | -9.88E-01 | 2.61E-08 | WE(3:0_20:4)           | WE      | WE      | -8.88E-01 | 3.15E-04 |
| PG(20:1_18:2)     | PG      | PL      | -9.88E-01 | 6.26E-08 | PG(16:1_20:2)          | PG      | PL      | -8.86E-01 | 3.99E-04 |
| DGMG(18:3)        | DGMG    | GL      | -9.87E-01 | 1.39E-07 | PC(42:3)               | PC      | PL      | -8.83E-01 | 2.85E-04 |
| LPC(18:2)         | LPC     | PL      | -9.87E-01 | 4.22E-08 | LPE(24:0)              | LPE     | PL      | -8.82E-01 | 4.04E-04 |
| LPE(18:2)         | LPE     | PL      | -9.87E-01 | 1.42E-08 | DG(18:1_18:2)          | DG      | DG      | -8.81E-01 | 3.60E-04 |
| DGDG(16:0_18:3)   | DGDG    | GL      | -9.86E-01 | 2.56E-07 | PE(22:1_18:2)          | PE      | PL      | -8.78E-01 | 2.53E-04 |
| PG(16:0_20:1)     | PG      | PL      | -9.86E-01 | 1.93E-07 | PG(16:0_18:1)          | PG      | PL      | -8.77E-01 | 4.07E-04 |
| LPE(16:1)         | LPE     | PL      | -9.84E-01 | 8.05E-08 | TG(10:0_18:2_18:3)     | TG      | TG      | -8.77E-01 | 4.39E-04 |
| LPE(24:1)         | LPE     | PL      | -9.84E-01 | 2.38E-08 | DG(16:0_18:1)          | DG      | DG      | -8.76E-01 | 4.01E-04 |
| PE(16:0_16:0)     | PE      | PL      | -9.84E-01 | 4.51E-08 | TG(43:9)               | TG      | TG      | -8.76E-01 | 4.02E-04 |
| DG(20:1_20:1)     | DG      | DG      | -9.83E-01 | 2.42E-07 | DG(24:1_18:2)          | DG      | DG      | -8.74E-01 | 5.53E-04 |
| WE(19:0_17:4)     | WE      | WE      | -9.81E-01 | 2.96E-07 | PA(16:1_18:3)          | PA      | PL      | -8.74E-01 | 4.10E-04 |
| DG(18:4_16:1)     | DG      | DG      | -9.80E-01 | 5.54E-07 | TG(18:3_18:2_22:3)     | TG      | TG      | -8.74E-01 | 5.53E-04 |
| DGDG(18:1_18:3)   | DGDG    | GL      | -9.80E-01 | 8.30E-07 | Cer(d18:2_25:0+O)      | Cer     | Cer     | -8.73E-01 | 6.30E-04 |
| LPE(22:0)         | LPE     | PL      | -9.80E-01 | 6.17E-07 | PE(18:2_23:0)          | PE      | PL      | -8.73E-01 | 2.78E-04 |
| LPC(14:0)         | LPC     | PL      | -9.78E-01 | 7.46E-07 | Cer(d18:1+hO_27:0)     | Cer     | Cer     | -8.71E-01 | 7.51E-04 |
| dMePE(32:2)       | dMePE   | PL      | -9.76E-01 | 4.26E-07 | PE(24:0_18:2)          | PE      | PL      | -8.69E-01 | 2.96E-04 |
| LPE(16:0)         | LPE     | PL      | -9.76E-01 | 3.95E-07 | TG(18:4_16:1_18:3)     | TG      | TG      | -8.69E-01 | 6.28E-04 |
| SQDG(16:0_18:3)   | SQDG    | GL      | -9.72E-01 | 1.74E-06 | Cer(d18:0+pO_22:0)     | Cer     | Cer     | -8.68E-01 | 8.37E-04 |
| dMePE(18:1_18:2)  | dMePE   | PL      | -9.71E-01 | 1.60E-06 | DG(18:2_23:1)          | DG      | DG      | -8.67E-01 | 6.90E-04 |
| LPE(18:1)         | LPE     | PL      | -9.71E-01 | 6.43E-07 | CerG1(d18:1+hO_26:0+O) | CerG1   | Cer     | -8.66E-01 | 6.30E-04 |
| PE(20:1_18:2)     | PE      | PL      | -9.71E-01 | 1.61E-06 | Cer(d18:0+pO_26:0)     | Cer     | Cer     | -8.65E-01 | 7.73E-04 |
| PG(16:0_16:0)     | PG      | PL      | -9.71E-01 | 2.72E-06 | Cer(d18:1+hO_26:0+O)   | Cer     | Cer     | -8.57E-01 | 1.18E-03 |
| So(d18:1+hO)      | So      | So      | -9.70E-01 | 3.64E-06 | CerG1(d18:1+hO_24:0+O) | CerG1   | Cer     | -8.56E-01 | 7.97E-04 |
| DG(14:0_18:3)     | DG      | DG      | -9.69E-01 | 3.10E-06 | AGlcSiE(18:1)          | AGlcSiE | AGlcSiE | -8.54E-01 | 1.04E-03 |
| DG(18:2_23:0)     | DG      | DG      | -9.68E-01 | 3.01E-06 | DGDG(18:3_18:3)        | DGDG    | GL      | -8.47E-01 | 1.39E-03 |
| Cer(d38:3)        | Cer     | Cer     | -9.67E-01 | 3.81E-06 | Cer(d18:1+hO_28:0+O)   | Cer     | Cer     | -8.42E-01 | 1.48E-03 |
| DGDG(18:0_18:2)   | DGDG    | GL      | -9.66E-01 | 6.23E-06 | Cer(d18:2_26:0+O)      | Cer     | Cer     | -8.42E-01 | 1.46E-03 |
| LPG(18:2)         | LPG     | PL      | -9.65E-01 | 4.88E-06 | PI(20:3_18:2)          | PI      | PL      | -8.38E-01 | 8.20E-04 |
| DG(15:0_18:1)     | DG      | DG      | -9.64E-01 | 3.04E-06 | PC(27:1_11:4)          | PC      | PL      | -8.30E-01 | 1.40E-03 |
| LPC(16:0)         | LPC     | PL      | -9.63E-01 | 3.99E-06 | PA(18:3_18:3)          | PA      | PL      | -8.29E-01 | 1.35E-03 |
| DG(17:1_18:2)     | DG      | DG      | -9.61E-01 | 2.95E-06 | TG(18:3_20:3_22:3)     | TG      | TG      | -8.29E-01 | 1.56E-03 |
| DG(22:1_18:2)     | DG      | DG      | -9.61E-01 | 5.88E-06 | PE(25:0_18:2)          | PE      | PL      | -8.24E-01 | 1.03E-03 |
| PG(16:0_16:1)     | PG      | PL      | -9.60E-01 | 5.54E-06 | DG(18:0_18:1)          | DG      | DG      | -8.23E-01 | 1.72E-03 |
| PI(20:2_18:2)     | PI      | PL      | -9.60E-01 | 2.38E-06 | DG(17:0_18:2)          | DG      | DG      | -8.14E-01 | 1.93E-03 |
| Cer(d18:2_24:0+O) | Cer     | Cer     | -9.59E-01 | 7.48E-06 | DG(18:1_18:3)          | DG      | DG      | -8.14E-01 | 2.18E-03 |
| DG(15:0_18:3)     | DG      | DG      | -9.57E-01 | 8.17E-06 | MGMG(18:3)             | MGMG    | GL      | -8.14E-01 | 2.68E-03 |
| MGDG(18:1_18:2)   | MGDG    | GL      | -9.57E-01 | 1.05E-05 | DG(18:1_18:1)          | DG      | DG      | -8.13E-01 | 1.95E-03 |
| DG(20:1_18:1)     | DG      | DG      | -9.56E-01 | 7.83E-06 | PI(34:6)               | PI      | PL      | -8.10E-01 | 1.97E-03 |
| LPG(16:0)         | LPG     | PL      | -9.55E-01 | 9.37E-06 | Cer(d18:1+hO_26:0)     | Cer     | Cer     | -8.06E-01 | 3.26E-03 |
| DG(20:1_18:2)     | DG      | DG      | -9.53E-01 | 1.01E-05 | TG(16:0_14:0_18:2)     | TG      | TG      | -8.02E-01 | 2.84E-03 |
| DGDG(16:0_18:2)   | DGDG    | GL      | -9.50E-01 | 2.61E-05 | PC(42:4)               | PC      | PL      | -7.96E-01 | 2.56E-03 |
| DG(16:1_18:3)     | DG      | DG      | -9.49E-01 | 1.65E-05 | DG(16:0_16:0)          | DG      | DG      | -7.90E-01 | 3.38E-03 |
| StE(24:7)         | StE     | Sterols | -9.49E-01 | 1.18E-05 | DG(17:0_18:1)          | DG      | DG      | -7.89E-01 | 2.94E-03 |
| DG(16:0_16:1)     | DG      | DG      | -9.48E-01 | 1.57E-05 | TG(18:4_17:1_18:3)     | TG      | TG      | -7.81E-01 | 4.04E-03 |
| AGlcSiE(18:2)     | AGlcSiE | AGlcSiE | -9.46E-01 | 2.14E-05 | DG(19:1_18:3)          | DG      | DG      | -7.60E-01 | 4.95E-03 |
| DGDG(16:1_18:3)   | DGDG    | GL      | -9.43E-01 | 3.28E-05 | So(d18:0+pO)           | So      | So      | -7.57E-01 | 7.34E-03 |
| MGDG(16:2_18:2)   | MGDG    | GL      | -9.38E-01 | 4.57E-05 | TG(18:3_14:1_18:3)     | TG      | TG      | -7.44E-01 | 7.63E-03 |
| DG(17:1_18:3)     | DG      | DG      | -9.36E-01 | 2.48E-05 | PC(34:6)               | PC      | PL      | -7.38E-01 | 6.42E-03 |
| DG(18:3_20:2)     | DG      | DG      | -9.32E-01 | 4.16E-05 | LPI(16:0)              | LPI     | PL      | -7.35E-01 | 7.43E-03 |
| MGDG(18:2_18:2)   | MGDG    | GL      | -9.29E-01 | 7.66E-05 | TG(18:1_18:2_18:3)     | TG      | TG      | -7.29E-01 | 9.04E-03 |
| PI(20:1_18:2)     | PI      | PL      | -9.27E-01 | 3.40E-05 | TG(12:0_18:2_18:3)     | TG      | TG      | -7.25E-01 | 9.57E-03 |
| DG(20:1_18:3)     | DG      | DG      | -9.24E-01 | 6.64E-05 | LPI(18:2)              | LPI     | PL      | -7.22E-01 | 8.67E-03 |
| WE(3:0_18:1)      | WE      | WE      | -9.18E-01 | 1.05E-04 | TG(16:0_12:0_18:2)     | TG      | TG      | -7.17E-01 | 1.06E-02 |
| PC(42:2)          | PC      | PL      | -9.11E-01 | 8.62E-05 | PI(14:0_18:3)          | PI      | PL      | -7.11E-01 | 1.25E-02 |
| PE(20:1_18:3)     | PE      | PL      | -9.11E-01 | 1.40E-04 | PC(37:3)               | PC      | PL      | -7.08E-01 | 9.69E-03 |
| LPC(18:1)         | LPC     | PL      | -9.08E-01 | 1.03E-04 | PE(15:0_18:2)          | PE      | PL      | -7.03E-01 | 1.45E-02 |
| PC(40:3)          | PC      | PL      | -9.07E-01 | 1.13E-04 | TG(18:3_17:1_18:3)     | TG      | TG      | -7.01E-01 | 1.24E-02 |
| LPC(16:1)         | LPC     | PL      | -9.04E-01 | 1.84E-04 | LdMePE(16:0)           | LdMePE  | PL      | -6.80E-01 | 1.48E-02 |
| DG(16:1_16:1)     | DG      | DG      | -9.02E-01 | 1.52E-04 | AGlcSiE(16:1)          | AGlcSiE | AGlcSiE | -6.79E-01 | 1.49E-02 |
|                   |         |         |           |          | DG(16:0_14:0)          | DG      | DG      | -6.79E-01 | 1.61E-02 |
|                   |         |         |           |          | TG(18:3_18:2_20:3)     | TG      | TG      | -6.79E-01 | 1.66E-02 |
|                   |         |         |           |          | TG(16:1_18:3_18:3)     | TG      | TG      | -6.70E-01 | 1.89E-02 |
|                   |         |         |           |          | TG(16:0_18:1_18:2)     | TG      | TG      | -6.62E-01 | 2.02E-02 |
|                   |         |         |           |          | PI(15:0_18:2)          | PI      | PL      | -6.61E-01 | 1.81E-02 |
|                   |         |         |           |          | CerG1(d18:1+hO_23:0+O) | CerG1   | Cer     | -6.60E-01 | 2.00E-02 |

|                      |         |         |           |          |                    |         |         |          |          |
|----------------------|---------|---------|-----------|----------|--------------------|---------|---------|----------|----------|
| PC(30:0)             | PC      | PL      | -6.45E-01 | 2.04E-02 | PS(22:0_18:3)      | PS      | PL      | 4.49E-01 | 1.13E-01 |
| LPE(18:0)            | LPE     | PL      | -6.20E-01 | 2.41E-02 | PC(18:3_18:3)      | PC      | PL      | 4.72E-01 | 8.50E-02 |
| Cer(d18:0+pO_23:0)   | Cer     | Cer     | -6.01E-01 | 3.81E-02 | PI(16:1_18:3)      | PI      | PL      | 4.79E-01 | 7.34E-02 |
| DGDG(18:2_18:3)      | DGDG    | GL      | -5.80E-01 | 3.90E-02 | PS(18:3_18:2)      | PS      | PL      | 4.95E-01 | 8.43E-02 |
| LPS(18:2)            | LPS     | PL      | -5.79E-01 | 3.58E-02 | PG(18:3_18:3)      | PG      | PL      | 5.00E-01 | 5.87E-02 |
| AGlcSIE(19:1)        | AGlcSIE | AGlcSIE | -5.73E-01 | 4.21E-02 | TG(4:0_16:0_18:3)  | TG      | TG      | 5.28E-01 | 6.26E-02 |
| SQDG(18:2_18:3)      | SQDG    | GL      | -5.73E-01 | 3.59E-02 | PS(22:0_18:2)      | PS      | PL      | 5.30E-01 | 6.84E-02 |
| PI(20:0_18:2)        | PI      | PL      | -5.63E-01 | 3.65E-02 | LPC(18:0)          | LPC     | PL      | 5.34E-01 | 5.57E-02 |
| DG(16:1_18:2)        | DG      | DG      | -5.62E-01 | 4.94E-02 | LPI(18:0)          | LPI     | PL      | 5.56E-01 | 5.37E-02 |
| PG(15:0_18:3)        | PG      | PL      | -5.61E-01 | 5.35E-02 | MG(24:1)           | MG      | MG      | 5.66E-01 | 3.46E-02 |
| LPC(18:3)            | LPC     | PL      | -5.56E-01 | 5.07E-02 | PE(18:2_18:2)      | PE      | PL      | 5.74E-01 | 3.45E-02 |
| Cer(d18:1+hO_24:0+O) | Cer     | Cer     | -5.52E-01 | 5.75E-02 | PI(16:0_18:2)      | PI      | PL      | 5.82E-01 | 4.61E-02 |
| TG(18:3_18:2_18:3)   | TG      | TG      | -5.49E-01 | 5.47E-02 | TG(18:3_18:3_20:3) | TG      | TG      | 5.86E-01 | 3.60E-02 |
| PC(33:2)             | PC      | PL      | -5.40E-01 | 5.86E-02 | PE(16:0_16:1)      | PE      | PL      | 6.31E-01 | 2.07E-02 |
| MG(20:0)             | MG      | MG      | -5.36E-01 | 5.13E-02 | PE(16:1_18:3)      | PE      | PL      | 6.51E-01 | 1.69E-02 |
| TG(19:0_18:3_18:3)   | TG      | TG      | -5.29E-01 | 5.84E-02 | TG(18:3_18:3_22:3) | TG      | TG      | 6.60E-01 | 1.84E-02 |
| LPI(18:1)            | LPI     | PL      | -5.27E-01 | 5.18E-02 | TG(19:1_18:3_18:3) | TG      | TG      | 6.94E-01 | 1.29E-02 |
| TG(14:0_18:2_18:3)   | TG      | TG      | -5.25E-01 | 6.36E-02 | TG(15:0_18:3_18:3) | TG      | TG      | 6.99E-01 | 1.09E-02 |
| MG(16:0)             | MG      | MG      | -5.20E-01 | 5.84E-02 | PS(24:1_18:2)      | PS      | PL      | 7.08E-01 | 1.47E-02 |
| DG(24:1_18:3)        | DG      | DG      | -5.11E-01 | 6.87E-02 | PC(37:4)           | PC      | PL      | 7.46E-01 | 6.99E-03 |
| PG(16:1_18:2)        | PG      | PL      | -5.08E-01 | 8.10E-02 | PE(16:0_18:2)      | PE      | PL      | 7.79E-01 | 2.91E-03 |
| BisMePE(16:0_18:2)   | BisMePE | PL      | -4.92E-01 | 7.53E-02 | PI(15:0_18:3)      | PI      | PL      | 8.02E-01 | 2.85E-03 |
| LPC(15:0)            | LPC     | PL      | -4.72E-01 | 9.79E-02 | AGlcSIE(18:3)      | AGlcSIE | AGlcSIE | 8.18E-01 | 1.66E-03 |
| PA(18:1_18:2)        | PA      | PL      | -4.71E-01 | 8.07E-02 | PI(18:0_20:1)      | PI      | PL      | 8.23E-01 | 2.48E-03 |
| dMePE(18:3_18:2)     | dMePE   | PL      | -4.61E-01 | 1.03E-01 | PS(20:1_18:3)      | PS      | PL      | 8.28E-01 | 2.32E-03 |
| Cer(d18:0+pO_25:0)   | Cer     | Cer     | -4.44E-01 | 1.14E-01 | PE(18:3_22:1)      | PE      | PL      | 8.29E-01 | 1.29E-03 |
| PC(16:0_18:2)        | PC      | PL      | -4.35E-01 | 1.07E-01 | TG(16:0_18:3_18:3) | TG      | TG      | 8.39E-01 | 1.03E-03 |
| PC(38:6)             | PC      | PL      | -4.33E-01 | 1.01E-01 | PI(18:2_23:1)      | PI      | PL      | 8.50E-01 | 1.34E-03 |
| AGlcSIE(16:0)        | AGlcSIE | AGlcSIE | -4.28E-01 | 1.14E-01 | PS(18:3_22:1)      | PS      | PL      | 8.52E-01 | 1.31E-03 |
| PS(18:1_18:2)        | PS      | PL      | -4.26E-01 | 9.17E-02 | PI(14:0_18:2)      | PI      | PL      | 8.59E-01 | 5.55E-04 |
| PC(35:4)             | PC      | PL      | -4.15E-01 | 1.03E-01 | TG(18:4_15:0_18:3) | TG      | TG      | 8.62E-01 | 5.84E-04 |
| TG(18:1_12:0_18:2)   | TG      | TG      | -3.84E-01 | 1.42E-01 | PS(18:0_18:2)      | PS      | PL      | 8.72E-01 | 3.20E-04 |
| PC(16:0_18:1)        | PC      | PL      | -3.72E-01 | 1.43E-01 | So(d18:0)          | So      | So      | 8.74E-01 | 3.96E-04 |
| LPE(18:3)            | LPE     | PL      | -3.68E-01 | 1.54E-01 | PI(17:0_18:2)      | PI      | PL      | 8.77E-01 | 6.97E-04 |
| WE(5:0_17:3)         | WE      | WE      | -3.45E-01 | 1.79E-01 | PI(18:3_18:2)      | PI      | PL      | 8.92E-01 | 3.17E-04 |
| So(d22:0+pO)         | So      | So      | -3.15E-01 | 1.93E-01 | PG(18:3_18:2)      | PG      | PL      | 9.00E-01 | 9.29E-05 |
| MG(18:0)             | MG      | MG      | -2.84E-01 | 2.12E-01 | PE(16:0_20:1)      | PE      | PL      | 9.11E-01 | 2.26E-04 |
| PI(18:2_23:0)        | PI      | PL      | -2.74E-01 | 1.97E-01 | PI(18:0_18:2)      | PI      | PL      | 9.20E-01 | 1.32E-04 |
| Cer(d18:1+hO_25:0+O) | Cer     | Cer     | -2.44E-01 | 2.69E-01 | dMePE(16:1_18:1)   | dMePE   | PL      | 9.21E-01 | 7.74E-05 |
| DG(18:0_18:0)        | DG      | DG      | -2.33E-01 | 2.64E-01 | PE(18:1_18:1)      | PE      | PL      | 9.29E-01 | 5.10E-05 |
| PA(18:1_18:1)        | PA      | PL      | -2.33E-01 | 2.42E-01 | PS(24:1_18:3)      | PS      | PL      | 9.30E-01 | 9.31E-05 |
| So(d20:0+pO)         | So      | So      | -2.06E-01 | 2.95E-01 | Cer(d16:0_19:0)    | Cer     | Cer     | 9.33E-01 | 4.42E-05 |
| TG(12:0_18:3_18:3)   | TG      | TG      | -1.78E-01 | 3.17E-01 | PE(18:3_18:2)      | PE      | PL      | 9.33E-01 | 2.00E-05 |
| TG(10:0_18:3_18:3)   | TG      | TG      | -1.71E-01 | 3.17E-01 | MGMG(16:3)         | MGMG    | GL      | 9.34E-01 | 5.16E-05 |
| TG(18:3_18:3_18:3)   | TG      | TG      | -1.26E-01 | 3.76E-01 | PI(18:0_18:1)      | PI      | PL      | 9.36E-01 | 6.87E-05 |
| PG(18:2_18:2)        | PG      | PL      | -1.08E-01 | 4.09E-01 | PE(24:1_18:2)      | PE      | PL      | 9.39E-01 | 4.56E-05 |
| DG(18:0_16:0)        | DG      | DG      | -7.22E-02 | 4.24E-01 | TG(10:0_10:1_18:1) | TG      | TG      | 9.39E-01 | 2.92E-05 |
| PG(16:1_18:1)        | PG      | PL      | -6.57E-02 | 4.63E-01 | DGDG(16:3_18:3)    | DGDG    | GL      | 9.44E-01 | 1.10E-05 |
| PC(35:3)             | PC      | PL      | -2.05E-02 | 4.65E-01 | AGlcSIE(17:0)      | AGlcSIE | AGlcSIE | 9.45E-01 | 1.72E-05 |
| PA(20:1_18:2)        | PA      | PL      | 2.48E-03  | 4.79E-01 | PS(16:0_18:3)      | PS      | PL      | 9.48E-01 | 3.03E-05 |
| dMePE(16:0_18:3)     | dMePE   | PL      | 1.06E-02  | 4.69E-01 | Cer(d18:1_15:0)    | Cer     | Cer     | 9.74E-01 | 7.32E-07 |
| PE(18:1_18:2)        | PE      | PL      | 1.58E-02  | 4.63E-01 | PE(18:3_18:3)      | PE      | PL      | 9.76E-01 | 2.74E-07 |
| PG(15:0_18:2)        | PG      | PL      | 2.85E-02  | 4.42E-01 | PI(18:2_18:2)      | PI      | PL      | 9.76E-01 | 2.36E-06 |
| PE(17:0_18:2)        | PE      | PL      | 3.43E-02  | 4.39E-01 | PE(16:0_18:1)      | PE      | PL      | 9.77E-01 | 1.06E-06 |
| MGDG(16:3_18:3)      | MGDG    | GL      | 3.82E-02  | 4.37E-01 | PS(18:3_18:3)      | PS      | PL      | 9.79E-01 | 1.15E-06 |
| PC(34:4)             | PC      | PL      | 4.25E-02  | 4.70E-01 | PI(17:0_18:3)      | PI      | PL      | 9.82E-01 | 9.32E-07 |
| DG(20:0_22:0)        | DG      | DG      | 4.96E-02  | 4.26E-01 | PI(18:3_18:3)      | PI      | PL      | 9.85E-01 | 1.10E-07 |
| PA(18:2_18:2)        | PA      | PL      | 5.24E-02  | 4.48E-01 | PI(16:0_18:3)      | PI      | PL      | 9.89E-01 | 5.09E-08 |
| PC(16:0_20:1)        | PC      | PL      | 6.52E-02  | 4.50E-01 | LPI(17:0)          | LPI     | PL      | 9.91E-01 | 4.24E-08 |
| Cer(d18:0_16:0)      | Cer     | Cer     | 9.06E-02  | 3.72E-01 | dMePE(16:1_18:3)   | dMePE   | PL      | 9.92E-01 | 6.38E-10 |
| PC(17:1_13:0)        | PC      | PL      | 1.36E-01  | 3.79E-01 | DGDG(17:0_18:2)    | DGDG    | GL      | 9.93E-01 | 7.84E-10 |
| AGlcSIE(17:1)        | AGlcSIE | AGlcSIE | 1.38E-01  | 3.56E-01 | LPC(17:0)          | LPC     | PL      | 9.93E-01 | 1.90E-09 |
| TG(15:0_18:2_18:3)   | TG      | TG      | 1.76E-01  | 3.00E-01 |                    |         |         |          |          |
| AGlcSIE(15:0)        | AGlcSIE | AGlcSIE | 1.96E-01  | 2.83E-01 |                    |         |         |          |          |
| PI(18:0_18:3)        | PI      | PL      | 2.35E-01  | 2.93E-01 |                    |         |         |          |          |
| DG(18:3_18:3)        | DG      | DG      | 2.93E-01  | 1.98E-01 |                    |         |         |          |          |
| PS(20:0_18:2)        | PS      | PL      | 3.14E-01  | 2.09E-01 |                    |         |         |          |          |
| PC(34:3)             | PC      | PL      | 3.16E-01  | 1.88E-01 |                    |         |         |          |          |
| PC(35:2)             | PC      | PL      | 3.23E-01  | 1.86E-01 |                    |         |         |          |          |
| PS(16:0_18:2)        | PS      | PL      | 3.53E-01  | 1.83E-01 |                    |         |         |          |          |
| TG(16:0_18:2_18:3)   | TG      | TG      | 3.86E-01  | 1.27E-01 |                    |         |         |          |          |
| TG(17:0_18:3_18:3)   | TG      | TG      | 4.00E-01  | 1.23E-01 |                    |         |         |          |          |
| TG(20:1_18:3_18:3)   | TG      | TG      | 4.35E-01  | 9.89E-02 |                    |         |         |          |          |

**Table S5** : List of  $p_{\text{corr}}$  from OPLS-DA and  $P$ -value from Welsch T-test of *Arabidopsis thaliana* seed samples *ndufs8* vs *col0*

| ID                     | family  | cat     | pcorr     | pvalue   |                  |        |    |           |          |
|------------------------|---------|---------|-----------|----------|------------------|--------|----|-----------|----------|
| AGlcSiE(15:0)          | AGlcSiE | AGlcSiE | -2.20E-01 | 2.67E-01 | DGDG(16:0_18:3)  | DGDG   | GL | -2.85E-01 | 2.17E-01 |
| AGlcSiE(16:0)          | AGlcSiE | AGlcSiE | -5.74E-01 | 4.06E-02 | DGDG(16:1_18:3)  | DGDG   | GL | 9.20E-01  | 4.51E-05 |
| AGlcSiE(16:1)          | AGlcSiE | AGlcSiE | -4.06E-01 | 1.22E-01 | DGDG(16:3_18:3)  | DGDG   | GL | 4.14E-01  | 1.10E-01 |
| AGlcSiE(17:0)          | AGlcSiE | AGlcSiE | 6.86E-01  | 1.45E-02 | DGDG(17:0_18:2)  | DGDG   | GL | 9.94E-01  | 1.25E-10 |
| AGlcSiE(17:1)          | AGlcSiE | AGlcSiE | -7.69E-01 | 4.13E-03 | DGDG(18:0_18:2)  | DGDG   | GL | 2.96E-01  | 1.90E-01 |
| AGlcSiE(18:1)          | AGlcSiE | AGlcSiE | -9.38E-01 | 2.89E-05 | DGDG(18:1_18:3)  | DGDG   | GL | -8.56E-01 | 9.75E-04 |
| AGlcSiE(18:2)          | AGlcSiE | AGlcSiE | -9.47E-01 | 1.52E-05 | DGDG(18:2_18:3)  | DGDG   | GL | 3.59E-01  | 1.48E-01 |
| AGlcSiE(18:3)          | AGlcSiE | AGlcSiE | 1.29E-01  | 3.63E-01 | DGDG(18:2_20:1)  | DGDG   | GL | -7.65E-01 | 7.28E-03 |
| AGlcSiE(19:1)          | AGlcSiE | AGlcSiE | -8.83E-01 | 3.55E-04 | DGDG(18:3_18:3)  | DGDG   | GL | 8.26E-01  | 1.16E-03 |
| BisMePE(16:0_18:2)     | BisMePE | PL      | -9.01E-01 | 1.79E-04 | DGDG(18:3_20:2)  | DGDG   | GL | 3.98E-01  | 1.13E-01 |
| Cer(d16:0_19:0)        | Cer     | Cer     | 8.97E-01  | 2.25E-04 | DGDG(18:3_20:3)  | DGDG   | GL | -9.42E-01 | 2.94E-05 |
| Cer(d18:0_16:0)        | Cer     | Cer     | -6.66E-01 | 2.10E-02 | DGMG(18:2)       | DGMG   | GL | -8.56E-01 | 1.16E-03 |
| Cer(d18:0+pO_22:0)     | Cer     | Cer     | -9.35E-01 | 5.27E-05 | DGMG(18:3)       | DGMG   | GL | -6.86E-01 | 1.69E-02 |
| Cer(d18:0+pO_23:0)     | Cer     | Cer     | -8.90E-01 | 3.31E-04 | dMePE(16:0_18:3) | dMePE  | PL | -7.30E-02 | 4.35E-01 |
| Cer(d18:0+pO_24:0)     | Cer     | Cer     | -9.32E-01 | 5.80E-05 | dMePE(16:1_18:1) | dMePE  | PL | 9.86E-01  | 1.01E-07 |
| Cer(d18:0+pO_25:0)     | Cer     | Cer     | -8.91E-01 | 3.29E-04 | dMePE(16:1_18:3) | dMePE  | PL | 9.68E-01  | 8.39E-07 |
| Cer(d18:0+pO_26:0)     | Cer     | Cer     | -9.35E-01 | 4.76E-05 | dMePE(18:1_18:2) | dMePE  | PL | -9.48E-01 | 1.76E-05 |
| Cer(d18:1_15:0)        | Cer     | Cer     | 8.63E-01  | 4.23E-04 | dMePE(18:3_18:2) | dMePE  | PL | -4.36E-01 | 1.15E-01 |
| Cer(d18:1+hO_24:0+O)   | Cer     | Cer     | -6.79E-01 | 1.70E-02 | dMePE(32:2)      | dMePE  | PL | -9.72E-01 | 2.22E-06 |
| Cer(d18:1+hO_25:0+O)   | Cer     | Cer     | -7.17E-01 | 1.08E-02 | LdMePE(16:0)     | LdMePE | PL | -7.65E-01 | 5.18E-03 |
| Cer(d18:1+hO_26:0)     | Cer     | Cer     | -8.78E-01 | 4.69E-04 | LPC(14:0)        | LPC    | PL | -9.55E-01 | 1.68E-05 |
| Cer(d18:1+hO_26:0+O)   | Cer     | Cer     | -8.06E-01 | 2.47E-03 | LPC(15:0)        | LPC    | PL | -8.19E-01 | 2.73E-03 |
| Cer(d18:1+hO_27:0)     | Cer     | Cer     | -9.35E-01 | 5.23E-05 | LPC(16:0)        | LPC    | PL | -6.40E-01 | 2.75E-02 |
| Cer(d18:1+hO_28:0+O)   | Cer     | Cer     | -8.87E-01 | 3.97E-04 | LPC(16:1)        | LPC    | PL | -9.04E-01 | 2.64E-04 |
| Cer(d18:2_24:0+O)      | Cer     | Cer     | -9.74E-01 | 1.30E-06 | LPC(17:0)        | LPC    | PL | 9.79E-01  | 1.89E-07 |
| Cer(d18:2_25:0+O)      | Cer     | Cer     | -9.45E-01 | 2.41E-05 | LPC(18:0)        | LPC    | PL | 9.72E-01  | 8.61E-07 |
| Cer(d18:2_26:0+O)      | Cer     | Cer     | -9.05E-01 | 1.93E-04 | LPC(18:1)        | LPC    | PL | 7.98E-01  | 2.79E-03 |
| Cer(d38:3)             | Cer     | Cer     | -8.47E-01 | 1.10E-03 | LPC(18:2)        | LPC    | PL | -8.89E-01 | 4.45E-04 |
| CerG1(d18:1+hO_23:0+O) | CerG1   | Cer     | -8.44E-01 | 1.04E-03 | LPC(18:3)        | LPC    | PL | 4.11E-01  | 1.05E-01 |
| CerG1(d18:1+hO_24:0+O) | CerG1   | Cer     | -9.18E-01 | 8.82E-05 | LPC(20:1)        | LPC    | PL | 4.43E-01  | 9.98E-02 |
| CerG1(d18:1+hO_26:0+O) | CerG1   | Cer     | -9.21E-01 | 6.60E-05 | LPC(20:2)        | LPC    | PL | -9.77E-01 | 8.60E-07 |
| DG(14:0_18:3)          | DG      | DG      | -9.76E-01 | 1.30E-06 | LPC(20:3)        | LPC    | PL | -2.08E-01 | 2.76E-01 |
| DG(15:0_18:1)          | DG      | DG      | -9.35E-01 | 3.88E-05 | LPE(16:0)        | LPE    | PL | -5.33E-01 | 6.02E-02 |
| DG(15:0_18:3)          | DG      | DG      | -9.72E-01 | 1.21E-06 | LPE(16:1)        | LPE    | PL | -9.15E-01 | 1.61E-04 |
| DG(16:0_14:0)          | DG      | DG      | -6.54E-01 | 2.35E-02 | LPE(18:0)        | LPE    | PL | 8.83E-01  | 3.76E-04 |
| DG(16:0_16:0)          | DG      | DG      | -8.16E-01 | 2.39E-03 | LPE(18:1)        | LPE    | PL | 7.65E-01  | 5.39E-03 |
| DG(16:0_16:1)          | DG      | DG      | -9.33E-01 | 3.21E-05 | LPE(18:2)        | LPE    | PL | -9.25E-01 | 8.25E-05 |
| DG(16:0_18:1)          | DG      | DG      | -5.43E-01 | 4.94E-02 | LPE(18:3)        | LPE    | PL | 8.36E-01  | 9.12E-04 |
| DG(16:0_18:2)          | DG      | DG      | -8.94E-01 | 2.27E-04 | LPE(20:1)        | LPE    | PL | 2.31E-01  | 2.69E-01 |
| DG(16:1_16:1)          | DG      | DG      | -3.24E-01 | 1.79E-01 | LPE(22:0)        | LPE    | PL | -9.70E-01 | 3.43E-06 |
| DG(16:1_18:2)          | DG      | DG      | 2.92E-01  | 2.06E-01 | LPE(24:0)        | LPE    | PL | -9.14E-01 | 1.57E-04 |
| DG(16:1_18:3)          | DG      | DG      | 4.10E-01  | 1.27E-01 | LPE(24:1)        | LPE    | PL | -9.34E-01 | 4.31E-05 |
| DG(17:0_18:1)          | DG      | DG      | 4.60E-01  | 9.11E-02 | LPG(16:0)        | LPG    | PL | -9.85E-01 | 2.75E-07 |
| DG(17:0_18:2)          | DG      | DG      | 7.08E-01  | 1.06E-02 | LPG(18:2)        | LPG    | PL | -9.90E-01 | 8.64E-08 |
| DG(17:1_18:2)          | DG      | DG      | 1.35E-01  | 3.71E-01 | LPI(16:0)        | LPI    | PL | -8.43E-01 | 1.51E-03 |
| DG(17:1_18:3)          | DG      | DG      | -8.51E-02 | 4.25E-01 | LPI(17:0)        | LPI    | PL | 9.93E-01  | 4.62E-09 |
| DG(18:0_16:0)          | DG      | DG      | -5.37E-01 | 5.91E-02 | LPI(18:0)        | LPI    | PL | 9.04E-01  | 1.77E-04 |
| DG(18:0_18:0)          | DG      | DG      | -5.97E-01 | 3.64E-02 | LPI(18:1)        | LPI    | PL | 9.72E-01  | 1.38E-06 |
| DG(18:0_18:1)          | DG      | DG      | -4.33E-01 | 1.02E-01 | LPI(18:2)        | LPI    | PL | -9.29E-01 | 7.28E-05 |
| DG(18:1_18:1)          | DG      | DG      | 5.96E-01  | 3.82E-02 | LPS(18:2)        | LPS    | PL | -6.47E-01 | 2.08E-02 |
| DG(18:1_18:2)          | DG      | DG      | 9.63E-02  | 4.36E-01 | MG(16:0)         | MG     | MG | -2.57E-01 | 2.52E-01 |
| DG(18:1_18:3)          | DG      | DG      | -6.19E-01 | 2.57E-02 | MG(18:0)         | MG     | MG | -2.22E-01 | 2.74E-01 |
| DG(18:2_23:0)          | DG      | DG      | -9.62E-01 | 3.84E-06 | MG(20:0)         | MG     | MG | -5.81E-01 | 3.99E-02 |
| DG(18:2_23:1)          | DG      | DG      | -9.59E-01 | 4.54E-06 | MG(24:1)         | MG     | MG | 6.06E-01  | 2.34E-02 |
| DG(18:3_18:3)          | DG      | DG      | 9.91E-01  | 1.80E-08 | MGDG(16:2_18:2)  | MGDG   | GL | 8.06E-01  | 2.08E-03 |
| DG(18:3_20:2)          | DG      | DG      | -9.26E-01 | 3.96E-05 | MGDG(16:3_18:3)  | MGDG   | GL | 1.14E-01  | 3.65E-01 |
| DG(18:4_16:1)          | DG      | DG      | -8.82E-01 | 3.04E-04 | MGDG(18:1_18:2)  | MGDG   | GL | -7.59E-01 | 6.84E-03 |
| DG(19:1_18:3)          | DG      | DG      | 1.75E-01  | 3.32E-01 | MGDG(18:2_18:2)  | MGDG   | GL | -8.52E-01 | 1.15E-03 |
| DG(20:0_22:0)          | DG      | DG      | -9.40E-01 | 3.10E-05 | MGMG(16:3)       | MGMG   | GL | -8.42E-01 | 9.02E-04 |
| DG(20:1_18:1)          | DG      | DG      | -8.91E-01 | 2.25E-04 | MGMG(18:3)       | MGMG   | GL | 3.01E-01  | 1.93E-01 |
| DG(20:1_18:2)          | DG      | DG      | -9.05E-01 | 1.21E-04 | PA(16:1_18:3)    | PA     | PL | -9.23E-01 | 6.22E-05 |
| DG(20:1_18:3)          | DG      | DG      | -5.80E-01 | 3.50E-02 | PA(18:1_18:1)    | PA     | PL | 5.02E-02  | 4.59E-01 |
| DG(20:1_20:1)          | DG      | DG      | -9.60E-01 | 3.88E-06 | PA(18:1_18:2)    | PA     | PL | -7.19E-01 | 8.54E-03 |
| DG(22:1_18:2)          | DG      | DG      | -9.01E-01 | 1.63E-04 | PA(18:2_18:2)    | PA     | PL | -4.41E-01 | 9.64E-02 |
| DG(24:1_18:2)          | DG      | DG      | -7.82E-01 | 3.58E-03 | PA(18:3_18:3)    | PA     | PL | -8.45E-01 | 8.64E-04 |
| DG(24:1_18:3)          | DG      | DG      | 6.33E-01  | 2.58E-02 | PA(20:1_18:2)    | PA     | PL | -1.88E-02 | 4.65E-01 |
| DGDG(16:0_18:2)        | DGDG    | GL      | -4.24E-01 | 1.18E-01 | PC(16:0_18:1)    | PC     | PL | -4.84E-01 | 7.29E-02 |
|                        |         |         |           |          | PC(16:0_18:2)    | PC     | PL | -6.62E-01 | 1.75E-02 |
|                        |         |         |           |          | PC(16:0_20:1)    | PC     | PL | 5.83E-01  | 4.32E-02 |
|                        |         |         |           |          | PC(17:1_13:0)    | PC     | PL | 5.47E-01  | 5.64E-02 |
|                        |         |         |           |          | PC(18:3_18:3)    | PC     | PL | 8.88E-01  | 3.45E-04 |
|                        |         |         |           |          | PC(27:1_11:4)    | PC     | PL | -8.72E-01 | 4.21E-04 |
|                        |         |         |           |          | PC(30:0)         | PC     | PL | -8.96E-01 | 2.02E-04 |

|               |    |    |           |          |                    |      |         |           |          |
|---------------|----|----|-----------|----------|--------------------|------|---------|-----------|----------|
| PC(33:2)      | PC | PL | -9.08E-01 | 1.24E-04 | PI(34:5)           | PI   | PL      | -8.79E-01 | 2.71E-04 |
| PC(34:3)      | PC | PL | -1.99E-01 | 2.81E-01 | PI(34:6)           | PI   | PL      | -2.88E-01 | 2.00E-01 |
| PC(34:4)      | PC | PL | 6.16E-01  | 3.23E-02 | PS(16:0_18:2)      | PS   | PL      | -2.99E-01 | 1.82E-01 |
| PC(34:6)      | PC | PL | -5.80E-01 | 3.48E-02 | PS(16:0_18:3)      | PS   | PL      | 9.45E-01  | 3.16E-05 |
| PC(35:2)      | PC | PL | 7.37E-01  | 8.12E-03 | PS(18:0_18:2)      | PS   | PL      | -2.27E-01 | 2.87E-01 |
| PC(35:3)      | PC | PL | 9.16E-01  | 1.24E-04 | PS(18:1_18:2)      | PS   | PL      | 2.61E-02  | 4.97E-01 |
| PC(35:4)      | PC | PL | 5.93E-02  | 4.44E-01 | PS(18:3_18:2)      | PS   | PL      | 7.53E-01  | 7.67E-03 |
| PC(37:3)      | PC | PL | -9.67E-02 | 3.80E-01 | PS(18:3_18:3)      | PS   | PL      | 9.79E-01  | 8.92E-07 |
| PC(37:4)      | PC | PL | 8.67E-01  | 6.40E-04 | PS(18:3_22:1)      | PS   | PL      | 8.89E-01  | 3.98E-04 |
| PC(38:6)      | PC | PL | 7.26E-01  | 1.02E-02 | PS(20:0_18:2)      | PS   | PL      | -4.81E-01 | 7.25E-02 |
| PC(40:3)      | PC | PL | -9.24E-01 | 4.65E-05 | PS(20:1_18:3)      | PS   | PL      | 4.63E-01  | 1.01E-01 |
| PC(40:4)      | PC | PL | -7.50E-01 | 6.00E-03 | PS(22:0_18:2)      | PS   | PL      | -1.86E-01 | 2.94E-01 |
| PC(42:2)      | PC | PL | -9.39E-01 | 2.45E-05 | PS(22:0_18:3)      | PS   | PL      | 1.03E-01  | 4.09E-01 |
| PC(42:3)      | PC | PL | -8.94E-01 | 2.11E-04 | PS(24:1_18:2)      | PS   | PL      | 2.25E-01  | 2.80E-01 |
| PC(42:4)      | PC | PL | -9.21E-01 | 5.03E-05 | PS(24:1_18:3)      | PS   | PL      | 8.66E-01  | 7.29E-04 |
| PE(15:0_18:2) | PE | PL | -9.61E-01 | 9.18E-06 | So(d18:0)          | So   | So      | -7.42E-01 | 8.11E-03 |
| PE(16:0_16:0) | PE | PL | -9.82E-01 | 1.54E-07 | So(d18:0+pO)       | So   | So      | -9.03E-01 | 2.33E-04 |
| PE(16:0_16:1) | PE | PL | 8.34E-01  | 9.47E-04 | So(d18:1+hO)       | So   | So      | -9.70E-01 | 2.05E-06 |
| PE(16:0_18:1) | PE | PL | 9.64E-01  | 4.59E-06 | So(d20:0+pO)       | So   | So      | -2.54E-01 | 2.58E-01 |
| PE(16:0_18:2) | PE | PL | -8.68E-01 | 7.91E-04 | So(d22:0+pO)       | So   | So      | -2.90E-01 | 2.23E-01 |
| PE(16:0_20:1) | PE | PL | 9.63E-01  | 6.01E-06 | SQDG(16:0_18:3)    | SQDG | GL      | 9.78E-01  | 6.47E-07 |
| PE(16:1_18:3) | PE | PL | 7.83E-01  | 2.92E-03 | SQDG(18:2_18:3)    | SQDG | GL      | -6.39E-01 | 2.28E-02 |
| PE(17:0_18:2) | PE | PL | 9.73E-01  | 7.04E-07 | StE(24:7)          | StE  | Sterols | -9.63E-01 | 3.32E-06 |
| PE(17:1_16:0) | PE | PL | -1.29E-01 | 3.71E-01 | TG(10:0_10:1_18:1) | TG   | TG      | 9.93E-01  | 9.44E-09 |
| PE(18:1_18:1) | PE | PL | 9.87E-01  | 8.32E-08 | TG(10:0_18:2_18:3) | TG   | TG      | -8.65E-01 | 5.73E-04 |
| PE(18:1_18:2) | PE | PL | -6.86E-02 | 4.40E-01 | TG(10:0_18:3_18:3) | TG   | TG      | 5.19E-01  | 6.50E-02 |
| PE(18:2_18:2) | PE | PL | -7.23E-01 | 1.08E-02 | TG(12:0_18:2_18:3) | TG   | TG      | -8.31E-01 | 1.40E-03 |
| PE(18:2_23:0) | PE | PL | -9.41E-01 | 1.92E-05 | TG(12:0_18:3_18:3) | TG   | TG      | 2.55E-01  | 2.43E-01 |
| PE(18:3_18:2) | PE | PL | 7.91E-01  | 2.52E-03 | TG(14:0_18:2_18:3) | TG   | TG      | -8.27E-01 | 1.49E-03 |
| PE(18:3_18:3) | PE | PL | 9.73E-01  | 3.87E-07 | TG(15:0_18:2_18:3) | TG   | TG      | -6.70E-01 | 1.64E-02 |
| PE(18:3_22:1) | PE | PL | -8.56E-01 | 1.00E-03 | TG(15:0_18:3_18:3) | TG   | TG      | -5.66E-01 | 4.33E-02 |
| PE(20:1_18:2) | PE | PL | -9.48E-01 | 1.74E-05 | TG(16:0_12:0_18:2) | TG   | TG      | -6.04E-01 | 3.06E-02 |
| PE(20:1_18:3) | PE | PL | -1.36E-01 | 3.64E-01 | TG(16:0_14:0_18:2) | TG   | TG      | -7.89E-01 | 2.99E-03 |
| PE(22:0_18:2) | PE | PL | -9.27E-01 | 5.48E-05 | TG(16:0_18:1_18:2) | TG   | TG      | -6.09E-01 | 2.89E-02 |
| PE(22:1_18:2) | PE | PL | -9.58E-01 | 4.55E-06 | TG(16:0_18:2_18:3) | TG   | TG      | -8.59E-02 | 4.02E-01 |
| PE(24:0_18:2) | PE | PL | -8.84E-01 | 3.25E-04 | TG(16:0_18:3_18:3) | TG   | TG      | 4.55E-01  | 9.45E-02 |
| PE(24:1_18:2) | PE | PL | -8.58E-01 | 6.93E-04 | TG(16:1_18:3_18:3) | TG   | TG      | -8.85E-01 | 3.23E-04 |
| PE(25:0_18:2) | PE | PL | -8.88E-01 | 2.81E-04 | TG(17:0_18:3_18:3) | TG   | TG      | -3.04E-01 | 1.94E-01 |
| PG(15:0_18:2) | PG | PL | -8.65E-01 | 8.17E-04 | TG(18:1_12:0_18:2) | TG   | TG      | -6.45E-01 | 2.13E-02 |
| PG(15:0_18:3) | PG | PL | -7.84E-01 | 5.20E-03 | TG(18:1_18:2_18:3) | TG   | TG      | -6.35E-01 | 2.29E-02 |
| PG(16:0_16:0) | PG | PL | -9.92E-01 | 9.11E-09 | TG(18:3_14:1_18:3) | TG   | TG      | -8.66E-01 | 5.96E-04 |
| PG(16:0_16:1) | PG | PL | 2.22E-01  | 2.69E-01 | TG(18:3_17:1_18:3) | TG   | TG      | -9.01E-01 | 1.73E-04 |
| PG(16:0_18:1) | PG | PL | 9.71E-01  | 2.44E-06 | TG(18:3_18:2_18:3) | TG   | TG      | -8.40E-01 | 1.13E-03 |
| PG(16:0_20:1) | PG | PL | -9.54E-01 | 9.49E-06 | TG(18:3_18:2_20:3) | TG   | TG      | -5.43E-01 | 5.19E-02 |
| PG(16:1_18:1) | PG | PL | -8.99E-01 | 2.67E-04 | TG(18:3_18:2_22:3) | TG   | TG      | -7.92E-01 | 3.05E-03 |
| PG(16:1_18:2) | PG | PL | -9.27E-01 | 8.18E-05 | TG(18:3_18:3_18:3) | TG   | TG      | -8.36E-01 | 1.25E-03 |
| PG(16:1_20:2) | PG | PL | -8.88E-01 | 3.26E-04 | TG(18:3_18:3_20:3) | TG   | TG      | 7.21E-01  | 9.59E-03 |
| PG(18:2_18:2) | PG | PL | -9.44E-01 | 2.83E-05 | TG(18:3_18:3_22:3) | TG   | TG      | 7.94E-01  | 3.01E-03 |
| PG(18:3_18:2) | PG | PL | -8.79E-01 | 5.72E-04 | TG(18:3_20:3_22:3) | TG   | TG      | 6.44E-02  | 4.40E-01 |
| PG(18:3_18:3) | PG | PL | 4.84E-01  | 6.53E-02 | TG(18:4_15:0_18:3) | TG   | TG      | 1.28E-01  | 3.64E-01 |
| PG(20:1_18:2) | PG | PL | -9.25E-01 | 7.51E-05 | TG(18:4_16:1_18:3) | TG   | TG      | -9.41E-01 | 2.42E-05 |
| PI(14:0_18:2) | PI | PL | 9.41E-01  | 1.93E-05 | TG(18:4_17:1_18:3) | TG   | TG      | -9.29E-01 | 5.22E-05 |
| PI(14:0_18:3) | PI | PL | -9.88E-01 | 3.40E-08 | TG(19:0_18:3_18:3) | TG   | TG      | -4.10E-01 | 1.15E-01 |
| PI(15:0_18:2) | PI | PL | -9.32E-01 | 3.14E-05 | TG(19:1_18:3_18:3) | TG   | TG      | 1.91E-01  | 3.04E-01 |
| PI(15:0_18:3) | PI | PL | 5.22E-01  | 6.95E-02 | TG(20:1_18:3_18:3) | TG   | TG      | 5.59E-01  | 4.77E-02 |
| PI(16:0_18:2) | PI | PL | -8.87E-01 | 1.38E-04 | TG(4:0_16:0_18:3)  | TG   | TG      | 9.89E-01  | 6.73E-08 |
| PI(16:0_18:3) | PI | PL | 8.89E-01  | 4.53E-04 | TG(43:9)           | TG   | TG      | -9.31E-01 | 3.71E-05 |
| PI(16:1_18:3) | PI | PL | 9.39E-01  | 2.11E-05 | WE(19:0_17:4)      | WE   | WE      | -9.45E-01 | 1.16E-05 |
| PI(17:0_18:2) | PI | PL | 9.51E-01  | 2.07E-05 | WE(3:0_18:1)       | WE   | WE      | -9.83E-01 | 6.63E-08 |
| PI(17:0_18:3) | PI | PL | 9.59E-01  | 1.24E-05 | WE(3:0_20:3)       | WE   | WE      | -9.86E-01 | 6.88E-08 |
| PI(18:0_18:1) | PI | PL | 9.74E-01  | 2.12E-06 | WE(3:0_20:4)       | WE   | WE      | -9.80E-01 | 2.27E-07 |
| PI(18:0_18:2) | PI | PL | 9.54E-01  | 1.98E-05 | WE(5:0_17:3)       | WE   | WE      | 1.15E-02  | 4.61E-01 |
| PI(18:0_18:3) | PI | PL | 9.83E-01  | 8.59E-07 |                    |      |         |           |          |
| PI(18:0_20:1) | PI | PL | 8.87E-01  | 4.11E-04 |                    |      |         |           |          |
| PI(18:2_18:2) | PI | PL | 9.68E-01  | 5.20E-06 |                    |      |         |           |          |
| PI(18:2_23:0) | PI | PL | -7.66E-01 | 4.52E-03 |                    |      |         |           |          |
| PI(18:2_23:1) | PI | PL | -7.87E-01 | 2.65E-03 |                    |      |         |           |          |
| PI(18:3_18:2) | PI | PL | 7.96E-01  | 3.74E-03 |                    |      |         |           |          |
| PI(18:3_18:3) | PI | PL | 9.94E-01  | 1.11E-08 |                    |      |         |           |          |
| PI(20:0_18:2) | PI | PL | 9.03E-01  | 2.85E-04 |                    |      |         |           |          |
| PI(20:1_18:2) | PI | PL | 5.85E-01  | 4.45E-02 |                    |      |         |           |          |
| PI(20:2_18:2) | PI | PL | -8.27E-01 | 9.43E-04 |                    |      |         |           |          |
| PI(20:3_18:2) | PI | PL | -6.58E-01 | 1.50E-02 |                    |      |         |           |          |

**Table S6** : List of  $p_{\text{corr}}$  from OPLS-DA and  $P$ -value from Welsch T-test of *Nicotiana sylvestris* seed samples CMSII vs WT

| ID                  | family   | cat     | pcorr     | pvalue   |                       |          |         |            |          |
|---------------------|----------|---------|-----------|----------|-----------------------|----------|---------|------------|----------|
| PI(18:1_18:2)       | PI       | PL      | -0.996364 | 3.62E-20 | PMe(18:1_18:2)        | PMe      | PL      | -0.81869   | 1.19E-05 |
| PE(16:0_18:1)_11.38 | PE       | PL      | -0.994034 | 2.38E-22 | Hex1Cer(d34:3)        | Hex1Cer  | Cer     | -0.818064  | 1.31E-05 |
| PE(16:0_18:1)_13.40 | PE       | PL      | -0.994034 | 2.38E-22 | PS(16:0_18:2)         | PS       | PL      | -0.815784  | 1.97E-05 |
| PI(20:2_18:2)       | PI       | PL      | -0.993624 | 1.79E-17 | PI(16:0_16:0)         | PI       | PL      | -0.807947  | 1.77E-05 |
| PG(16:0_17:0)       | PG       | PL      | -0.992158 | 7.1E-20  | Hex2Cer(d42:2+O)      | Hex2Cer  | Cer     | -0.801831  | 2.48E-05 |
| PE(18:1_18:2)_10.29 | PE       | PL      | -0.991432 | 3.52E-20 | DG(18:0_18:1)         | DG       | DG      | -0.796143  | 3.28E-05 |
| PE(18:1_18:2)_12.60 | PE       | PL      | -0.991432 | 3.52E-20 | DG(34:5)              | DG       | DG      | -0.79001   | 3.46E-05 |
| PI(20:0_18:2)       | PI       | PL      | -0.991039 | 1.49E-17 | PMe(18:0_18:1)        | PMe      | PL      | -0.781976  | 6.14E-05 |
| PC(16:0_18:1)       | PC       | PL      | -0.990653 | 8.14E-20 | DG(17:0_18:1)         | DG       | DG      | -0.781219  | 5.63E-05 |
| PE(18:0_18:1)       | PE       | PL      | -0.989073 | 3.08E-18 | DG(17:1_16:0)         | DG       | DG      | -0.78115   | 4.58E-05 |
| PI(18:2_18:2)       | PI       | PL      | -0.98774  | 1.25E-15 | Hex1Cer(d18:2_21:0+O) | Hex1Cer  | Cer     | -0.779218  | 5.69E-05 |
| PC(17:0_18:1)       | PC       | PL      | -0.987249 | 2.69E-17 | Hex1Cer(d18:2_25:0+O) | Hex1Cer  | Cer     | -0.77299   | 7.02E-05 |
| PE(20:0_18:2)_13.12 | PE       | PL      | -0.986992 | 6.77E-17 | DG(20:1_18:2)         | DG       | DG      | -0.770431  | 8.13E-05 |
| PE(20:0_18:2)_14.89 | PE       | PL      | -0.986992 | 6.77E-17 | DG(18:1_18:2)_14.41   | DG       | DG      | -0.764497  | 8.98E-05 |
| PI(16:0_18:1)       | PI       | PL      | -0.986385 | 3.04E-15 | PI(16:0_18:2)         | PI       | PL      | -0.761912  | 0.00016  |
| PC(18:1_18:2)       | PC       | PL      | -0.982547 | 6.68E-16 | Hex1Cer(d18:2_15:0+O) | Hex1Cer  | Cer     | -0.74556   | 0.000174 |
| LPE(18:1)           | LPE      | PL      | -0.981359 | 4.91E-15 | TG(18:4_16:1_18:3)    | TG       | TG      | -0.729513  | 0.000312 |
| MGDG(18:1_18:2)     | MGDG     | GL      | -0.980285 | 1.77E-15 | CL(72:4)              | CL       | PL      | -0.726811  | 0.0003   |
| PC(16:1_18:3)       | PC       | PL      | -0.980233 | 3.01E-15 | Hex1Cer(d18:2_23:0+O) | Hex1Cer  | Cer     | -0.716019  | 0.000382 |
| PE(18:1_20:2)       | PE       | PL      | -0.978868 | 6.82E-15 | SPH(t18:1)            | SPH      | SPH     | -0.71473   | 0.000355 |
| PI(18:0_18:1)       | PI       | PL      | -0.9737   | 7.68E-13 | PS(16:1_20:3)         | PS       | PL      | -0.710599  | 0.000598 |
| PE(20:2_18:2)       | PE       | PL      | -0.973586 | 8.21E-15 | DG(20:1_18:1)         | DG       | DG      | -0.70974   | 0.000498 |
| PC(17:1_18:2)       | PC       | PL      | -0.96751  | 1.1E-11  | AcHexSiE(18:0)        | AcHexSiE | Sterols | -0.704235  | 0.000618 |
| LPE(16:0)           | LPE      | PL      | -0.966928 | 1.27E-12 | DG(42:2e)             | DG       | DG      | -0.689342  | 0.000878 |
| LPI(16:0)           | LPI      | PL      | -0.963655 | 4.61E-11 | SM(t18:1_19:1)        | SM       | SM      | -0.687375  | 0.000907 |
| PI(18:3_18:2)       | PI       | PL      | -0.963501 | 1.21E-11 | AcHexSiE(16:0)        | AcHexSiE | Sterols | -0.658831  | 0.001625 |
| PI(17:0_18:1)       | PI       | PL      | -0.963041 | 2.88E-11 | PS(18:0_22:4)         | PS       | PL      | -0.644109  | 0.002848 |
| MGDG(16:0_18:2)     | MGDG     | GL      | -0.959608 | 2.69E-12 | PE(16:0_18:3)         | PE       | PL      | -0.633213  | 0.00303  |
| LPC(18:1)           | LPC      | PL      | -0.956615 | 1.48E-10 | CL(76:4)              | CL       | PL      | -0.629394  | 0.002985 |
| LPC(16:0)           | LPC      | PL      | -0.956551 | 1.47E-10 | AcHexSiE(15:0)        | AcHexSiE | Sterols | -0.595529  | 0.005947 |
| PG(16:0_16:1)       | PG       | PL      | -0.948541 | 1.2E-10  | DG(19:0_18:2)         | DG       | DG      | -0.590104  | 0.00641  |
| PE(15:0_18:2)       | PE       | PL      | -0.946606 | 6.01E-11 | AcHexCmE(18:2)        | AcHexCmE | Sterols | -0.589315  | 0.006677 |
| PC(18:0_18:1)       | PC       | PL      | -0.945881 | 1.1E-10  | DG(19:1_18:2)         | DG       | DG      | -0.580824  | 0.006163 |
| PS(18:2_21:0)       | PS       | PL      | -0.944763 | 1.68E-09 | DG(16:0_16:0)         | DG       | DG      | -0.574152  | 0.007023 |
| PC(20:1_18:2)       | PC       | PL      | -0.941119 | 1.68E-10 | PMe(20:2_18:2)        | PMe      | PL      | -0.573359  | 0.008509 |
| LPC(16:1)           | LPC      | PL      | -0.936103 | 2.98E-09 | CL(70:1)              | CL       | PL      | -0.558406  | 0.011433 |
| AcHexCmE(20:0)      | AcHexCmE | Sterols | -0.935524 | 4.14E-09 | DG(14:0_18:2)         | DG       | DG      | -0.526216  | 0.015865 |
| LPC(20:2)           | LPC      | PL      | -0.933888 | 2.87E-09 | Hex1Cer(d18:2_22:0+O) | Hex1Cer  | Cer     | -0.525482  | 0.017915 |
| CL(74:5)            | CL       | PL      | -0.930298 | 4.81E-09 | CmE(20:4)             | CmE      | Sterols | -0.507338  | 0.022551 |
| PC(16:0_16:1)       | PC       | PL      | -0.930034 | 1.83E-09 | DG(18:2_21:0)         | DG       | DG      | -0.488885  | 0.028694 |
| PC(17:1_16:0)       | PC       | PL      | -0.919913 | 1.49E-09 | TG(14:0_18:2_18:2)    | TG       | TG      | -0.488244  | 0.032035 |
| PI(18:0_18:2)       | PI       | PL      | -0.913975 | 4.29E-08 | AEA(18:1)             | AEA      | AEA     | -0.472299  | 0.036967 |
| PS(20:0_18:2)       | PS       | PL      | -0.912336 | 6.94E-08 | CL(70:3)              | CL       | PL      | -0.465545  | 0.038543 |
| SM(t38:2)           | SM       | SM      | -0.909714 | 4.92E-08 | AcHexStE(18:1)        | AcHexStE | Sterols | -0.458098  | 0.043192 |
| PS(20:0_18:3)       | PS       | PL      | -0.905216 | 1.14E-07 | DG(17:1_18:2)         | DG       | DG      | -0.456392  | 0.042645 |
| LPC(17:0)           | LPC      | PL      | -0.901234 | 9.61E-08 | DG(15:0_18:3)         | DG       | DG      | -0.454396  | 0.043211 |
| DG(25:0_18:2)       | DG       | DG      | -0.899892 | 1.3E-07  | Hex1Cer(d18:2_24:0+O) | Hex1Cer  | Cer     | -0.422759  | 0.062443 |
| DG(16:0_18:1)       | DG       | DG      | -0.898359 | 1.04E-07 | Hex1Cer(t18:1_23:0+O) | Hex1Cer  | Cer     | -0.407636  | 0.074951 |
| PS(22:0_18:2)       | PS       | PL      | -0.896809 | 2.75E-07 | TG(12:0_18:2_18:2)    | TG       | TG      | -0.390538  | 0.095864 |
| AcHexZyE(17:0)      | AcHexZyE | Sterols | -0.892733 | 2.45E-07 | TG(16:1_18:3_18:3)    | TG       | TG      | -0.390447  | 0.092437 |
| PI(15:0_18:2)       | PI       | PL      | -0.892632 | 2.06E-07 | PMe(16:0_18:2)        | PMe      | PL      | -0.373937  | 0.103238 |
| AcHexStE(18:0)      | AcHexStE | Sterols | -0.892397 | 2.18E-07 | CL(72:6)              | CL       | PL      | -0.360714  | 0.116245 |
| LPI(18:2)           | LPI      | PL      | -0.891187 | 3.25E-07 | Cer(t17:1_21:0+O)     | Cer      | Cer     | -0.334106  | 0.146517 |
| LPC(18:0)           | LPC      | PL      | -0.889691 | 1.99E-07 | Hex1Cer(d18:2_20:0+O) | Hex1Cer  | Cer     | -0.302133  | 0.192366 |
| LPC(18:2)           | LPC      | PL      | -0.886421 | 2.46E-07 | DG(33:0)              | DG       | DG      | -0.279289  | 0.204662 |
| Hex1Cer(d42:3+O)    | Hex1Cer  | Cer     | -0.883823 | 3.1E-07  | DG(39:3e)             | DG       | DG      | -0.276497  | 0.227424 |
| AcHexStE(17:0)      | AcHexStE | Sterols | -0.870549 | 9.1E-07  | PMe(18:2_18:2)        | PMe      | PL      | -0.24749   | 0.282841 |
| PI(16:0_18:3)       | PI       | PL      | -0.865564 | 1.37E-06 | AcHexSiE(20:2)        | AcHexSiE | Sterols | -0.244435  | 0.297474 |
| PMe(16:0_18:1)      | PMe      | PL      | -0.864535 | 1.25E-06 | DG(18:0_16:0)         | DG       | DG      | -0.225279  | 0.301792 |
| LPE(18:2)           | LPE      | PL      | -0.861753 | 6.44E-07 | DG(15:0_18:2)         | DG       | DG      | -0.18223   | 0.423259 |
| MePC(38:1)_12.971   | MePC     | PL      | -0.853082 | 2.13E-06 | PC(20:0_18:2)         | PC       | PL      | -0.180241  | 0.395276 |
| PS(36:3)            | PS       | PL      | -0.85299  | 3.68E-06 | DG(20:2_18:2)         | DG       | DG      | -0.1311    | 0.563772 |
| DG(16:1_18:3)       | DG       | DG      | -0.847399 | 2.85E-06 | DG(18:2_18:2)         | DG       | DG      | -0.0739082 | 0.736049 |
| PS(18:0_18:2)       | PS       | PL      | -0.844658 | 6.08E-06 | DG(16:0_18:2)_15.16   | DG       | DG      | -0.0325751 | 0.868578 |
| SM(t34:2)           | SM       | SM      | -0.830041 | 7.9E-06  | MePC(34:5)            | MePC     | PL      | 0.00683912 | 0.995414 |
| AcHexSiE(17:0)      | AcHexSiE | Sterols | -0.8287   | 9.7E-06  | Hex1Cer(d18:2_26:0+O) | Hex1Cer  | Cer     | 0.00764691 | 0.982836 |
| Cer(t40:2)          | Cer      | Cer     | -0.818696 | 9.34E-06 | DG(31:3e)             | DG       | DG      | 0.0484939  | 0.853009 |
|                     |          |         |           |          | TG(15:0_18:3_18:3)    | TG       | TG      | 0.0565007  | 0.808194 |
|                     |          |         |           |          | PE(14:0_18:2)         | PE       | PL      | 0.0636328  | 0.93321  |
|                     |          |         |           |          | Hex1Cer(d18:1_16:0+O) | Hex1Cer  | Cer     | 0.0663336  | 0.795894 |
|                     |          |         |           |          | Hex2Cer(t41:0)        | Hex2Cer  | Cer     | 0.0791029  | 0.736032 |
|                     |          |         |           |          | TG(18:1_10:1_10:1)    | TG       | TG      | 0.0791808  | 0.761153 |
|                     |          |         |           |          | TG(16:0_18:3_18:3)    | TG       | TG      | 0.0982274  | 0.674028 |

|                       |          |         |          |          |                  |       |    |          |          |
|-----------------------|----------|---------|----------|----------|------------------|-------|----|----------|----------|
| TG(10:0_18:2_18:2)    | TG       | TG      | 0.211888 | 0.365136 | PG(18:3_18:2)    | PG    | PL | 0.990535 | 4.73E-17 |
| PI(17:0_18:2)         | PI       | PL      | 0.251843 | 0.237561 | PG(16:0_18:3)    | PG    | PL | 0.990624 | 1.44E-17 |
| CL(78:6)              | CL       | PL      | 0.260716 | 0.278081 | PE(24:0_18:2)    | PE    | PL | 0.990903 | 4.98E-17 |
| Hex1Cer(d18:2_16:0)   | Hex1Cer  | Cer     | 0.291579 | 0.21457  | dMePE(20:2_18:2) | dMePE | PL | 0.991321 | 3.83E-17 |
| CL(74:9)              | CL       | PL      | 0.296811 | 0.206055 | PE(22:2_18:2)    | PE    | PL | 0.991321 | 3.83E-17 |
| Hex1Cer(t18:1_24:0+O) | Hex1Cer  | Cer     | 0.317943 | 0.17872  | PG(16:0_18:2)    | PG    | PL | 0.99359  | 1.42E-20 |
| Hex1Cer(t18:1_22:0+O) | Hex1Cer  | Cer     | 0.318051 | 0.174493 | PC(18:3_18:2)    | PC    | PL | 0.99539  | 1.39E-20 |
| LPC(24:0)             | LPC      | PL      | 0.335405 | 0.156656 | PC(24:0_18:2)    | PC    | PL | 0.995712 | 1.11E-20 |
| PG(16:0_18:1)         | PG       | PL      | 0.362375 | 0.118446 | PC(22:2_18:2)    | PC    | PL | 0.995846 | 4.38E-21 |
| ChE(20:0)             | ChE      | Sterols | 0.381983 | 0.094397 | PC(17:0_18:2)    | PC    | PL | 0.996529 | 3.81E-22 |
| SPH(t18:0)            | SPH      | SPH     | 0.395776 | 0.098388 | PC(18:0_18:2)    | PC    | PL | 0.99655  | 5.52E-21 |
| Hex1Cer(t18:1_26:0+O) | Hex1Cer  | Cer     | 0.416465 | 0.07132  | PC(22:0_18:2)    | PC    | PL | 0.997316 | 4.29E-22 |
| LPC(22:0)             | LPC      | PL      | 0.43865  | 0.059181 |                  |       |    |          |          |
| DG(22:0_18:2)         | DG       | DG      | 0.465079 | 0.042046 |                  |       |    |          |          |
| DG(18:0_18:2)         | DG       | DG      | 0.466592 | 0.040752 |                  |       |    |          |          |
| DG(17:1_18:3)         | DG       | DG      | 0.488531 | 0.033332 |                  |       |    |          |          |
| DG(18:3_18:2)         | DG       | DG      | 0.528228 | 0.018864 |                  |       |    |          |          |
| DG(14:0_18:3)         | DG       | DG      | 0.545648 | 0.015543 |                  |       |    |          |          |
| DG(19:1_18:3)         | DG       | DG      | 0.612537 | 0.00473  |                  |       |    |          |          |
| Cer(t16:0_18:1)       | Cer      | Cer     | 0.657439 | 0.00222  |                  |       |    |          |          |
| PE(24:0_18:3)         | PE       | PL      | 0.663196 | 0.00121  |                  |       |    |          |          |
| PE(16:0_18:2)         | PE       | PL      | 0.673056 | 0.001598 |                  |       |    |          |          |
| DG(17:0_18:2)         | DG       | DG      | 0.676388 | 0.0013   |                  |       |    |          |          |
| PE(18:3_18:3)         | PE       | PL      | 0.71774  | 0.000495 |                  |       |    |          |          |
| TG(18:2_10:1_10:1)    | TG       | TG      | 0.755582 | 0.000159 |                  |       |    |          |          |
| DG(22:2_18:2)         | DG       | DG      | 0.76522  | 0.000117 |                  |       |    |          |          |
| TG(19:1_18:2_18:3)    | TG       | TG      | 0.766583 | 9.4E-05  |                  |       |    |          |          |
| AcHexSIE(20:0)        | AcHexSIE | Sterols | 0.772029 | 8.55E-05 |                  |       |    |          |          |
| CL(82:6)              | CL       | PL      | 0.776125 | 7.86E-05 |                  |       |    |          |          |
| DG(18:3_18:3)         | DG       | DG      | 0.776271 | 8.11E-05 |                  |       |    |          |          |
| TG(18:3_18:2_18:3)    | TG       | TG      | 0.7907   | 3.66E-05 |                  |       |    |          |          |
| TG(18:3_10:1_10:1)    | TG       | TG      | 0.81561  | 1.87E-05 |                  |       |    |          |          |
| PG(18:0_18:1)         | PG       | PL      | 0.840787 | 3.27E-06 |                  |       |    |          |          |
| Hex1Cer(d18:2_18:0)   | Hex1Cer  | Cer     | 0.854257 | 3.04E-06 |                  |       |    |          |          |
| DG(41:5e)             | DG       | DG      | 0.856103 | 2.08E-06 |                  |       |    |          |          |
| MGDG(18:3_18:3)       | MGDG     | GL      | 0.863149 | 7.81E-07 |                  |       |    |          |          |
| TG(19:1_18:3_18:3)    | TG       | TG      | 0.878311 | 4.54E-07 |                  |       |    |          |          |
| PG(16:0_16:0)         | PG       | PL      | 0.892081 | 1.14E-07 |                  |       |    |          |          |
| TG(18:3_17:1_18:3)    | TG       | TG      | 0.892174 | 1.69E-07 |                  |       |    |          |          |
| DG(18:3_22:2)         | DG       | DG      | 0.895797 | 1.94E-07 |                  |       |    |          |          |
| PC(19:0_18:2)         | PC       | PL      | 0.896794 | 6.34E-08 |                  |       |    |          |          |
| PG(18:1_18:2)         | PG       | PL      | 0.914099 | 1.73E-08 |                  |       |    |          |          |
| PC(16:0_18:3)         | PC       | PL      | 0.921893 | 1.55E-09 |                  |       |    |          |          |
| PG(18:0_16:0)         | PG       | PL      | 0.925176 | 4.9E-09  |                  |       |    |          |          |
| Cer(t17:1_22:0+O)     | Cer      | Cer     | 0.929561 | 1.64E-09 |                  |       |    |          |          |
| Cer(d34:0+O)          | Cer      | Cer     | 0.932114 | 2.65E-09 |                  |       |    |          |          |
| Cer(t18:0_16:0)       | Cer      | Cer     | 0.932114 | 2.65E-09 |                  |       |    |          |          |
| PE(18:2_18:2)         | PE       | PL      | 0.933781 | 3.56E-09 |                  |       |    |          |          |
| Cer(t17:1_24:0+O)     | Cer      | Cer     | 0.93451  | 1.68E-09 |                  |       |    |          |          |
| PC(15:0_18:2)         | PC       | PL      | 0.937231 | 2.62E-09 |                  |       |    |          |          |
| Cer(t18:0_20:0)       | Cer      | Cer     | 0.942159 | 1.83E-10 |                  |       |    |          |          |
| TG(18:3_18:3_18:3)    | TG       | TG      | 0.946114 | 8.07E-10 |                  |       |    |          |          |
| PC(16:0_16:0)         | PC       | PL      | 0.949636 | 3.67E-10 |                  |       |    |          |          |
| PE(18:0_18:2)         | PE       | PL      | 0.953264 | 8.12E-10 |                  |       |    |          |          |
| PC(18:0_16:0)         | PC       | PL      | 0.955167 | 1.29E-10 |                  |       |    |          |          |
| PE(18:3_18:2)         | PE       | PL      | 0.960422 | 5.84E-11 |                  |       |    |          |          |
| Cer(t17:1_23:0+O)     | Cer      | Cer     | 0.961162 | 1.09E-11 |                  |       |    |          |          |
| Cer(d18:2_16:0+O)     | Cer      | Cer     | 0.966188 | 2.15E-11 |                  |       |    |          |          |
| PE(18:1_22:0)         | PE       | PL      | 0.969088 | 3.72E-12 |                  |       |    |          |          |
| MePC(41:5)            | MePC     | PL      | 0.974373 | 4.92E-12 |                  |       |    |          |          |
| MGDG(18:2_18:2)       | MGDG     | GL      | 0.979972 | 1.47E-13 |                  |       |    |          |          |
| PC(18:2_18:2)         | PC       | PL      | 0.980402 | 1.21E-14 |                  |       |    |          |          |
| Cer(t44:1+O)          | Cer      | Cer     | 0.981062 | 1.06E-14 |                  |       |    |          |          |
| Cer(t18:0_24:0)       | Cer      | Cer     | 0.981169 | 4.25E-15 |                  |       |    |          |          |
| Cer(t17:1_25:0+O)     | Cer      | Cer     | 0.981941 | 4.26E-15 |                  |       |    |          |          |
| Cer(t18:0_21:0)       | Cer      | Cer     | 0.982218 | 1.02E-15 |                  |       |    |          |          |
| Cer(t18:0_23:0)       | Cer      | Cer     | 0.983275 | 7.58E-16 |                  |       |    |          |          |
| PC(16:0_18:2)         | PC       | PL      | 0.983955 | 3.48E-14 |                  |       |    |          |          |
| PC(20:2_18:2)         | PC       | PL      | 0.983959 | 5.23E-14 |                  |       |    |          |          |
| Cer(t18:0_22:0)       | Cer      | Cer     | 0.984241 | 5.11E-16 |                  |       |    |          |          |
| PC(18:3_18:3)         | PC       | PL      | 0.984762 | 4.71E-15 |                  |       |    |          |          |
| PG(18:2_18:2)         | PG       | PL      | 0.98504  | 1.2E-15  |                  |       |    |          |          |
| PE(22:0_18:2)         | PE       | PL      | 0.98826  | 4.27E-16 |                  |       |    |          |          |



**Table S7** List of  $p_{\text{corr}}$  from OPLS-DA and  $P$ -value from Welsch T-test of *Nicotiana sylvestris* pollen samples CMSII vs WT

| Primary ID          | family | cat | pcorr    | pvalue   |                    |      |         |          |          |
|---------------------|--------|-----|----------|----------|--------------------|------|---------|----------|----------|
| cPA(18:2)           | cPA    | PL  | -0.99888 | 1.55E-06 | ChE(18:3)          | ChE  | Sterols | 0.554787 | 0.126033 |
| TG(18:3_18:3_18:3)  | TG     | TG  | -0.99775 | 9.36E-08 | PI(18:3_18:3)      | PI   | PL      | 0.623243 | 0.058693 |
| TG(25:0_18:3_18:3)  | TG     | TG  | -0.99745 | 2.50E-06 | TG(18:0_18:0_18:0) | TG   | TG      | 0.774719 | 0.02645  |
| DG(18:1_18:1)       | DG     | DG  | -0.99744 | 3.41E-06 | TG(18:3_18:2_20:3) | TG   | TG      | 0.800346 | 0.016719 |
| PC(40:3)            | PC     | PL  | -0.99626 | 1.40E-08 | DG(20:2_18:2)      | DG   | DG      | 0.819169 | 0.003636 |
| DG(17:1_18:3)       | DG     | DG  | -0.9958  | 2.10E-05 | PC(36:6p)          | PC   | PL      | 0.908296 | 0.001053 |
| TG(22:0_18:2_18:3)  | TG     | TG  | -0.9958  | 1.08E-08 | TG(18:3_18:3_22:3) | TG   | TG      | 0.908535 | 0.001841 |
| PC(38:1)            | PC     | PL  | -0.99564 | 1.11E-06 | TG(18:3_18:2_20:2) | TG   | TG      | 0.917667 | 0.002114 |
| TG(24:0_18:3_18:3)  | TG     | TG  | -0.99545 | 1.00E-05 | AcCa(18:3)         | AcCa | AcCa    | 0.924536 | 0.00021  |
| DG(18:1_18:2)       | DG     | DG  | -0.99539 | 1.27E-05 | PC(32:2)           | PC   | PL      | 0.924793 | 0.000915 |
| TG(24:0_18:2_18:3)  | TG     | TG  | -0.99538 | 5.36E-07 | PI(18:3_18:2)      | PI   | PL      | 0.938754 | 0.00016  |
| DG(18:3_18:3)       | DG     | DG  | -0.99524 | 2.31E-05 | WE(5:0_26:1)       | WE   | WE      | 0.939134 | 0.000302 |
| TG(17:0_18:3_18:3)  | TG     | TG  | -0.99502 | 2.14E-05 | WE(3:0_20:2)       | WE   | WE      | 0.940534 | 0.00052  |
| TG(16:1_18:2_18:3)  | TG     | TG  | -0.99492 | 6.78E-09 | SQDG(43:6)         | SQDG | GL      | 0.946801 | 0.000762 |
| TG(18:3_18:2_21:0)  | TG     | TG  | -0.99425 | 8.86E-07 | TG(18:0_18:2_18:3) | TG   | TG      | 0.953322 | 0.000173 |
| cPA(18:3)           | cPA    | PL  | -0.99362 | 8.25E-06 | PC(31:0)           | PC   | PL      | 0.958304 | 2.26E-05 |
| TG(25:0_18:2_18:3)  | TG     | TG  | -0.99348 | 1.63E-05 | TG(18:3_18:2_22:3) | TG   | TG      | 0.960741 | 0.000245 |
| Cer(d18:2_16:0+O)   | Cer    | Cer | -0.99301 | 1.28E-05 | TG(4:0_18:1_24:0)  | TG   | TG      | 0.961916 | 0.000505 |
| PC(42:3)            | PC     | PL  | -0.9923  | 1.11E-05 | TG(22:3_18:2_18:2) | TG   | TG      | 0.962445 | 0.000397 |
| DG(18:2_23:0)       | DG     | DG  | -0.99194 | 3.51E-05 | WE(5:0_24:0)       | WE   | WE      | 0.96656  | 0.000112 |
| DG(16:0_16:0)       | DG     | DG  | -0.9913  | 3.85E-06 | WE(5:0_26:2)       | WE   | WE      | 0.971626 | 0.000123 |
| DG(18:3_23:0)       | DG     | DG  | -0.99077 | 6.27E-05 | TG(24:1_18:3_18:3) | TG   | TG      | 0.972573 | 4.96E-06 |
| TG(24:0_18:2_18:2)  | TG     | TG  | -0.99021 | 1.69E-07 | TG(45:3e)          | TG   | TG      | 0.980581 | 6.22E-05 |
| TG(16:0_18:2_22:0)  | TG     | TG  | -0.99019 | 1.33E-06 | PC(33:2)           | PC   | PL      | 0.980973 | 5.86E-07 |
| TG(17:0_18:2_18:3)  | TG     | TG  | -0.99019 | 3.93E-05 | PG(18:2_18:2)      | PG   | PL      | 0.984116 | 2.11E-07 |
| PG(18:1_18:2)       | PG     | PL  | -0.98946 | 3.11E-05 | PC(32:0)           | PC   | PL      | 0.984612 | 2.71E-07 |
| TG(18:4_17:1_18:3)  | TG     | TG  | -0.98919 | 7.32E-05 | TG(4:0_18:2_22:0)  | TG   | TG      | 0.985399 | 6.39E-05 |
| DG(15:0_18:2)       | DG     | DG  | -0.98814 | 7.20E-07 | TG(6:0_16:1_22:1)  | TG   | TG      | 0.985411 | 6.37E-05 |
| DG(16:0_16:1)       | DG     | DG  | -0.98808 | 2.50E-07 | MG(26:0)           | MG   | PL      | 0.988323 | 2.05E-05 |
| PC(38:0)            | PC     | PL  | -0.98678 | 1.29E-06 | cPA(16:0)          | cPA  | PL      | 0.989615 | 6.41E-08 |
| TG(22:2_18:2_18:2)  | TG     | TG  | -0.98624 | 1.85E-07 | PC(34:0)           | PC   | PL      | 0.993883 | 2.76E-06 |
| PE(24:0_18:2)       | PE     | PL  | -0.98574 | 6.63E-07 | PC(33:1)           | PC   | PL      | 0.995444 | 1.01E-07 |
| PC(36:1)            | PC     | PL  | -0.9856  | 0.000111 |                    |      |         |          |          |
| PC(44:2)            | PC     | PL  | -0.9848  | 0.000116 |                    |      |         |          |          |
| LPC(18:1)           | LPC    | PL  | -0.98441 | 5.79E-05 |                    |      |         |          |          |
| TG(22:0_18:2_18:2)  | TG     | TG  | -0.98415 | 1.64E-07 |                    |      |         |          |          |
| PE(25:0_18:2)       | PE     | PL  | -0.98398 | 1.24E-06 |                    |      |         |          |          |
| TG(18:1_18:2_21:0)  | TG     | TG  | -0.98392 | 9.83E-05 |                    |      |         |          |          |
| DG(18:2_18:2)       | DG     | DG  | -0.98347 | 0.000192 |                    |      |         |          |          |
| PG(18:3_18:2)       | PG     | PL  | -0.98313 | 8.32E-05 |                    |      |         |          |          |
| TG(16:1_18:3_18:3)  | TG     | TG  | -0.98126 | 0.000196 |                    |      |         |          |          |
| PE(26:0_18:3)       | PE     | PL  | -0.98086 | 1.66E-06 |                    |      |         |          |          |
| CerG1(d18:2_26:0+O) | CerG1  | Cer | -0.98067 | 0.000215 |                    |      |         |          |          |
| TG(18:3_17:1_18:3)  | TG     | TG  | -0.97808 | 0.000231 |                    |      |         |          |          |
| TG(20:1_18:1_18:2)  | TG     | TG  | -0.9771  | 6.65E-06 |                    |      |         |          |          |
| DG(14:0_18:3)       | DG     | DG  | -0.97664 | 1.26E-06 |                    |      |         |          |          |
| PC(40:2)            | PC     | PL  | -0.97634 | 0.000314 |                    |      |         |          |          |
| CerG1(d18:2_17:0+O) | CerG1  | Cer | -0.97052 | 2.95E-06 |                    |      |         |          |          |
| LPC(18:2)           | LPC    | PL  | -0.96355 | 0.000655 |                    |      |         |          |          |
| LPC(16:1)           | LPC    | PL  | -0.96346 | 0.000497 |                    |      |         |          |          |
| TG(18:1_18:2_24:0)  | TG     | TG  | -0.95985 | 0.000264 |                    |      |         |          |          |
| DG(17:0_18:3)       | DG     | DG  | -0.95904 | 2.71E-05 |                    |      |         |          |          |
| LPC(15:0)           | LPC    | PL  | -0.95563 | 0.000844 |                    |      |         |          |          |
| TG(26:0_16:0_18:2)  | TG     | TG  | -0.94744 | 0.000888 |                    |      |         |          |          |
| PC(36:2)            | PC     | PL  | -0.94432 | 0.000338 |                    |      |         |          |          |
| PC(33:3)            | PC     | PL  | -0.92453 | 0.000894 |                    |      |         |          |          |
| TG(22:0_18:2_22:0)  | TG     | TG  | -0.89117 | 0.004361 |                    |      |         |          |          |
| PC(32:1)            | PC     | PL  | -0.88623 | 0.003511 |                    |      |         |          |          |
| LPC(17:0)           | LPC    | PL  | -0.8714  | 0.001216 |                    |      |         |          |          |
| TG(18:3_18:2_18:2)  | TG     | TG  | -0.86855 | 0.001386 |                    |      |         |          |          |
| CerG1(d18:2_16:0+O) | CerG1  | Cer | -0.86575 | 0.001081 |                    |      |         |          |          |
| PC(33:4)            | PC     | PL  | -0.81559 | 0.004614 |                    |      |         |          |          |
| PE(16:0_16:0)       | PE     | PL  | -0.64633 | 0.043411 |                    |      |         |          |          |
| PE(18:0_18:1)       | PE     | PL  | -0.59372 | 0.078046 |                    |      |         |          |          |
| LPC(16:0)           | LPC    | PL  | -0.45529 | 0.209559 |                    |      |         |          |          |
| PE(17:0_18:3)       | PE     | PL  | -0.1558  | 0.675082 |                    |      |         |          |          |
| Cer(d36:3)          | Cer    | Cer | 0.199213 | 0.600423 |                    |      |         |          |          |
